# Supplementary material for: Prospects for the Use of Metal-Based Nanoparticles as Adjuvants for Local Cancer Immunotherapy
Source: MDPI journal article supplement (doi:10.3390/pharmaceutics15051346), 2023-04-27
Supplement: s1 [file s1]

Table S2. Evidence level for MNPs and metal-based substances to be used as adjuvants

| Metal based NPs      | Model and administration route                                                           | Evaluation of results                                                                                    | Ref                                                                                                                                              |
|----------------------|------------------------------------------------------------------------------------------|----------------------------------------------------------------------------------------------------------|--------------------------------------------------------------------------------------------------------------------------------------------------|
| <b><u>Alum</u></b>   | Al-NPs                                                                                   | Mouse s/c injection at the root of tail or right flank or i/m injection in the calf muscles of hind limb | Adjuvant for developing vaccines for cancer immunotherapy [128-130]                                                                              |
|                      | Al-NPs (nanosized AlO(OH))                                                               | RAW264.7, DC2.4, BMDC cells                                                                              | Deliver antigen and adjuvant to APC in lymph nodes; augment antigen-specific CD8+ T cell responses and promote Th1 type immunity [131, 132]      |
|                      | Alhydrogel® and stabilized rod-shaped Al(OH) <sub>3</sub> -NPs (~60 nm) from Alhydrogel® | Mouse i/m injection in the calf muscles of hind limb                                                     | Elicited a robust TH1 immune response characterized by antigen-specific CD4+ T cells expressing IFN-γ and TNF, as well as high IgG2 titers [130] |
|                      | Aluminum adjuvant-integrated nano-Metal- Organic Frameworks (MOF)                        | Mouse s/c injection                                                                                      | Enhance humoral and cytotoxic T lymphocyte immune responses, accumulate in lymph nodes, uptake by DCs [134]                                      |
|                      | Alum-tethered cytokines                                                                  | Mouse intracranial injection                                                                             | Fusion to cytokines enhance immune response and survival [135]                                                                                   |
|                      | Aluminum hydroxide (alum) and recombinant cytokines NPs                                  | Mouse i/t administration                                                                                 | Alum-bound IL-12–ABP vs IL-12– ABP – increase tumor retention, response to therapy and survival, safety [136]                                    |
|                      | Alum-ABP-IFNα                                                                            | Mouse i/t administration                                                                                 | Similarly to [137] improves treatment efficacy and reduces toxicity [138].                                                                       |
| <b><u>Ferrum</u></b> | IONPs                                                                                    | Mouse                                                                                                    | Complement system activation, immune cell recruitment, and inflammasome activation [154]                                                         |

|                         |                                                                                                |                                                                      |                                                                                                                                                            |       |
|-------------------------|------------------------------------------------------------------------------------------------|----------------------------------------------------------------------|------------------------------------------------------------------------------------------------------------------------------------------------------------|-------|
|                         | IONPs                                                                                          | Mouse intratracheal instillations of 50uL each                       | Adjuvant outcome on Th2 response                                                                                                                           | [155] |
|                         | Mycobacterium tuberculosis vaccine with IONPs                                                  | Mouse s/c injection                                                  | Adjuvant enhanced the response of specific Th1 (CD4+ IFN- $\gamma$ ), Th17 (CD4+IL-17+) and TCD8+ cells                                                    | [156] |
|                         | IO-RNA-NPs                                                                                     | DC2.4 murine dendritic cells, B16F10-OVA murine melanoma cell; mouse | Ex-vivo DC activation; enhanced activation of antigen-experienced T-cells and priming of naïve T- cells in an antigen-specific manner                      | [157] |
|                         | Fe3O4 NPs                                                                                      | Mouse s/c injection                                                  | Enhance the H22 autovaccine                                                                                                                                | [158] |
|                         | Fe3O4-OVA NPs                                                                                  | Mouse i/t administration                                             | Humoral and cellular immune responses in BALB/c mice                                                                                                       | [159] |
| <b><u>Titanium</u></b>  | TiNPs with nickel (nitinol)                                                                    | Mouse i/p injection                                                  | Induce rapid expansion of T cells in (CAR)-T therapy                                                                                                       | [172] |
|                         | Spike TiO2                                                                                     | Mouse breast cancer 4T1 cells; mouse i/v administration              | Exhibited immunomodulatory effects and stimulated TNF- and IL-2 in a time- and concentration- dependent manner                                             | [177] |
|                         | HTiO2 NPs                                                                                      | Mouse i/v administration                                             | Demonstrate immunomodulatory effect with high levels of IL-6, IL- 1 $\beta$ , TNF- $\alpha$                                                                | [178] |
| <b><u>Manganese</u></b> | tadpole-ovoid manganese- doped hollow mesoporous silica coated gold nanoparticles (Au@HMnMSNs) | Murine breast cancer (4T1) cells; mouse i/v injection                | Enhance the induction of immunogenic cell death and maturation of dendritic cells; enhance the intratumoral infiltration of cytotoxic T lymphocytes (CTLs) | [183] |

|                                    |                                                                        |                                                    |                                                                                                                        |           |
|------------------------------------|------------------------------------------------------------------------|----------------------------------------------------|------------------------------------------------------------------------------------------------------------------------|-----------|
|                                    | (DOX)-loaded and phospholipid (PL)-coated hybrid NPs (PL/APMP-DOX NPs) | Mouse breast cancer 4T1 cells; mouse s/c injection | Boosts dendritic cell maturation and increased cytotoxic T lymphocyte infiltration into the tumor site                 | [103]     |
|                                    | Mn-phenolic network NPs                                                | macrophages; mouse                                 | Internalize into macrophages and stimulate M1 polarization; successfully inhibited tumor growth and prolonged survival | [187]     |
|                                    | CDN-Mn <sup>2+</sup> Particle, CMP                                     | CT26 tumour-bearing BALB/c i/t administration      | CDN STING agonist                                                                                                      | [66]      |
|                                    | MnJ, Mn Jelly                                                          | B16-OVA mouse model i/t immunisation               | STING agonist                                                                                                          | [188]     |
| <b><u>Copper</u></b>               | CuS                                                                    | B16-OVA mouse model                                | synergizes Toll-like receptor 9 agonists and immune checkpoint inhibitors                                              | [207]     |
| <b><u>Aurum</u></b>                | AuNPs                                                                  | Different models                                   | classical vaccines                                                                                                     | [35, 213] |
|                                    | Tn-antigen glycan-AuNPs                                                | Rabbit s/c injection                               | Long-lasting production of antibodies                                                                                  | [222]     |
|                                    | AuNPs functionalized with MUC-1 protein fragment                       | Primary peritoneum-derived macrophages             | Induce macrophage activation, increase antigen presentation and predominant M1 polarization                            | [223]     |
|                                    | AuNP-OVA without CpG adjuvants                                         | B16-OVA cells; mouse s/c injection                 | antigen-specific responses                                                                                             | [224]     |
| <b><u>Rare earth metal NPs</u></b> | Antigen-loaded UCNPs                                                   | Mouse s/c injection                                | Stimulate dendritic cell , induce an antigen-specific immune response                                                  | [236]     |

|                                                                           |                     |                                                                                                        |       |
|---------------------------------------------------------------------------|---------------------|--------------------------------------------------------------------------------------------------------|-------|
| Core-shell<br>upconversion<br>nanoparticle@p<br>orphyrinic MOFs<br>(UCSs) | Mouse s/c injection | Inhibit the growth of untreated distant tumors via specific tumor<br>infiltration of cytotoxic T cells | [237] |
| Europium-based<br>OVA nanovaccines                                        | Mouse s/c injection | STING agonist                                                                                          | [247] |

Abbreviations: s/c, subcutaneous; i/m, intramuscular; i/t, intratumoral; i/p, intraperitoneal; i/v, intravenous.
