# Supplementary material for: Prospects for the Use of Metal-Based Nanoparticles as Adjuvants for Local Cancer Immunotherapy
Source: Pharmaceutics. 2023 Apr 27;15(5):1346. doi: 10.3390/pharmaceutics15051346 (PMC10222518; doi:10.3390/pharmaceutics15051346)
Supplement: Supplementary file 1 [file pharmaceutics-15-01346-s001.zip › Clinical Trials Table S1.xlsx]

## Sheet: SearchResults_Comp31
99 Studies for: immunotherapy Intratumoral | Recruiting, Active, not recruiting, Completed Studies | Cancer
Type	Rank	Status	NCT Number	Title	Intatumoral	Study Results	Conditions	Interventions	Outcome Measures	Sponsor/Collaborators	Gender	Age	Phases	Enrollment	Funded Bys	Study Type	Study Designs	Other IDs	Start Date	Primary Completion Date	Completion Date	First Posted	Results First Posted	Last Update Posted	Locations	Study Documents	URL
cell	1	Completed	NCT00547144	Phase I/II Intratumoral DC Immunotherapy With Gemcitabine & XRT in Unresectable Pancreatic Cancer	I/T Cell Immunotherapy	No Results Available	Pancreatic Cancer	Drug: Gemcitabine|Procedure: Dendritic Cell Immunotherapy	o evaluate the immune response of patients treated with this regimen based on the presence and characterization of tumor-infiltrating white blood cells.|Phase II: To determine the overall response rate for this regimen as determined by radiographic criteria.|Phase I: To establish the maximally tolerated dose (MTD) and dose limiting toxicities (DLT) of intratumoral autologous dendritic cell vaccin…	George Albert Fisher|Stanford University	All	18 Years and older В (Adult, Older Adult)	Phase 1	2	Other	Interventional	Allocation: Non-Randomized|Intervention Model: Single Group Assignment|Masking: None (Open Label)|Primary Purpose: Treatment	PANC0003|95935|1454	October 2005	April 2008	April 2008	October 22, 2007		November 8, 2012	Stanford University School of Medicine, Stanford, California, United States		https://ClinicalTrials.gov/show/NCT00547144
cell	2	Completed	NCT02423928	Phase I Clinical Trial of Cryoimmunotherapy Against Prostate Cancer	I/T Cell Immunotherapy	No Results Available	Prostate Cancer	Biological: Dendritic cell based cryoimmunotherapy|Drug: Cyclophosphamide|Drug: ipilimumab	Composite measure of the safety and toxicity profile, including definition of the Maximum Tolerated Dose.|Pembrolizumab tested to boost dendritic cell-based immunity of patients 16 to 18 (3 last recruited patients to the trial).	Alden Cancer Therapy II|Haukeland University Hospital|Norwegian Radium Hospital	Male	18 Years and older В (Adult, Older Adult)	Phase 1	18	Industry|Other	Interventional	Allocation: N/A|Intervention Model: Single Group Assignment|Masking: None (Open Label)|Primary Purpose: Treatment	ACT2001|2014-001898-14	May 2015	August 16, 2019	August 16, 2019	April 22, 2015		October 25, 2019	Haukeland University Hospital Research Department, Bergen, Hordaland, Norway		https://ClinicalTrials.gov/show/NCT02423928
Adjuvant	3	Completed	NCT02423863	In Situ, Autologous Therapeutic Vaccination Against Solid Cancers With Intratumoral HiltonolВ®	Neoadjuvant - I/T Hiltonol - Polyinosinic-polycytidylic acid stabilized with polylysine and carboxymethylcellulose (poly-ICLC). Intratumoral injection of viral mimic and broad activator of innate and adaptive immunity.	No Results Available	Melanoma|Head and Neck Cancer|Sarcoma|Non-Melanoma Skin Cancers	Biological: Hiltonol	Evaluate safety of intratumoral (IT) plus intramuscular (IM) Polyinosinic-polycytidylic acid stabilized with polylysine and carboxymethylcellulose (poly-ICLC, HiltonolВ®) for treatment of patients with accessible solid tumors, with or with|Evaluate therapeutic efficacy assessed by Disease Control (CR, PR, or SD) as defined by the RECIST 1.1 Criteria.|Determine whether the study regimen of Poly-IC…	Oncovir, Inc.|National Institutes of Health (NIH)|Icahn School of Medicine at Mount Sinai|Bay Hematology Oncology|National Cancer Institute (NCI)|University of Missouri-Columbia|Chevy Chase Regional Cancer Care Associates LLC|Dermatologic Surgery Center of Washington LLC and Skin Cancer Treatment Center	All	18 Years and older В (Adult, Older Adult)	Phase 2	26	Industry|NIH|Other	Interventional	Allocation: N/A|Intervention Model: Single Group Assignment|Masking: None (Open Label)|Primary Purpose: Treatment	ONC2014-001|1R44CA183075-01A1	March 2015	August 31, 2020	August 31, 2020	April 22, 2015		December 17, 2020	Chevy Chase RCCA, Chevy Chase, Maryland, United States|Dermatologic Surgery Center Washington DC, Chevy Chase, Maryland, United States|Bay Hematology Oncology, Easton, Maryland, United States|University of Missouri School of Medicine, Columbia, Missouri, United States|Icahn School of Medicine at Mount Sinai, New York, New York, United States		https://ClinicalTrials.gov/show/NCT02423863
	4	Completed	NCT03003637	ImmunoModulation by the Combination of Ipilimumab and Nivolumab Neoadjuvant to Surgery In Advanced or Recurrent Head and Neck Carcinoma	intratumoral hypoxia	No Results Available	Immunotherapy|Head and Neck Neoplasms	Drug: Nivolumab|Drug: Ipilimumab	Phase Ib: the number of patients that will not endure a delay in surgery due to neoadjuvant immunotherapy related toxicity OR toxicity due to the treatment of immunotherapy related toxicity.|Phase II: Tumor response to neoadjuvant IT in terms of tumor tissue pathological response at time of surgery compared to RECIST 1.1 (FDG-PET and perfusion and diffusion weighted MRI).|Phase Ib/II: the potenti…	The Netherlands Cancer Institute	All	18 Years and older В (Adult, Older Adult)	Phase 1|Phase 2	33	Other	Interventional	Allocation: N/A|Intervention Model: Single Group Assignment|Masking: None (Open Label)|Primary Purpose: Treatment	N16IMC	February 28, 2017	October 12, 2019	February 12, 2021	December 28, 2016		February 15, 2021	NKI-AVL, Amsterdam, Noord-Holland, Netherlands		https://ClinicalTrials.gov/show/NCT03003637
mAB	5	Completed	NCT04090775	A Phase 2 Trial for Men With Metastatic Prostatic Adenocarcinoma	Monoclonal antibody (PD-1 inhibitor, nivolumab) and (anti-CTLA-4, ipilimumab) and cyclophosphamide will then be sequentially injected directly into the cancer immediately following cryosurgical freezing. It is speculated that neoantigens released from the cryoablated necrotic cancer will be available in the vicinity of the cryosurgical freezing field immediately following the procedure. Immature …	No Results Available	Metastatic Prostatic Adenocarcinoma	Drug: Opdivo Injectable Product|Drug: Yervoy Injectable Product|Drug: Cytoxan|Procedure: Cryosurgical freezing (cryosurgery)	Primary endpoint: PSA decline|Efficacy of cryosurgical freezing and intratumoral combination immunotherapy iRECIST criteria	Rampart Health, L.L.C.	Male	18 Years and older В (Adult, Older Adult)	Phase 2	12	Industry	Interventional	Allocation: N/A|Intervention Model: Single Group Assignment|Masking: None (Open Label)|Primary Purpose: Treatment	ABSCOPAL 1001	June 28, 2019	July 30, 2020	January 31, 2022	September 16, 2019		June 21, 2022	Antelope Valley Urology & Incontinence, Lancaster, California, United States|Ascension Providence Rochester Hospital, Rochester, Michigan, United States		https://ClinicalTrials.gov/show/NCT04090775
Cell + mAb	6	Completed	NCT03707808	Intratumoral Injection of Autologous CD1c (BDCA-1)+ myDC, Avelumab, and Ipilimumab Plus Systemic Nivolumab	I/T Cell Immunotherapy + I/T mAb	No Results Available	Solid Tumor|Metastases to Soft Tissue	Drug: intratumoral injection of autologous CD1c (BDCA-1)+ myDC	Incidence and severity of Treatment-related Adverse Events graded according to CTCAE of intratumoral injection of autologous CD1c (BDCA-1)+ myDC plus avelumab and ipilimumab in combination with iv nivolumab|Objective response rate (ORR) of intratumoral injected CD1c (BDCA-1)+ myDC, avelumab, and ipilimumab plus iv nivolumab	Universitair Ziekenhuis Brussel	All	18 Years and older В (Adult, Older Adult)	Phase 1	9	Other	Interventional	Allocation: N/A|Intervention Model: Single Group Assignment|Masking: None (Open Label)|Primary Purpose: Treatment	2017-BN-003	January 29, 2018	December 24, 2020	December 24, 2020	October 16, 2018		December 29, 2020	UZ Brussel, Jette, Brabant, Belgium		https://ClinicalTrials.gov/show/NCT03707808
Viral	7	Completed	NCT02977156	Immunization Strategy With Intra-tumoral Injections of Pexa-Vec With Ipilimumab in Metastatic / Advanced Solid Tumors.	intra-tumoral (IT) oncolytic virus	No Results Available	Metastatic Tumor|Advanced Tumor	Biological: Pexa-Vec|Drug: Ipilimumab	Part A (dose selection part): Dose Limiting Toxicities (DLTs)|Part B (expansion cohort): The 3-month objective response rate (ORR)|3-month objective response rate (ORR)|Best objective response rate|Disease Control Rate|Duration of response|ORR of injected and non injected lesions|Progression Free Survival (PFS)|Time To progression (TTP)|Overall Survival (OS)|Adverse Events reporting	Centre Leon Berard|Transgene	All	18 Years and older В (Adult, Older Adult)	Phase 1	22	Other|Industry	Interventional	Allocation: N/A|Intervention Model: Single Group Assignment|Masking: None (Open Label)|Primary Purpose: Treatment	ET14-035 (ISI-JX)	January 3, 2017	April 13, 2022	June 6, 2022	November 30, 2016		July 25, 2022	Institut Bergonie, Bordeaux, France|Centre LГ©on BГ©rard, Lyon, France|Hopital Saint Louis, Paris, France|Centre Hospitalier Lyon Sud, Pierre-BГ©nite, France|Institut Gustave Roussy, Villejuif, France		https://ClinicalTrials.gov/show/NCT02977156
Viral	8	Completed	NCT02423902	A Study of Ad-RTS-hIL-12 With Veledimex in Subjects With Breast Cancer	Intratumoral injection of Ad-RTS-hIL-12 (inducible adenoviral vector) in combination with veledimex (LMW compound)	No Results Available	Metastatic Breast Cancer	Biological: Ad-RTS-hIL-12|Drug: Veledimex	Composite measure of safety and tolerability of Ad-RTS-hIL-12 immunotherapy following a first-or second-line standard treatment in HER2-negative subjects, or together with a first- or second-line anti-HER2 antibody therapy in HER2-positive subjects|Progression rate at 12 weeks after the start of one cycle of Ad-RTS-hIL-12 immunotherapy|Overall response rate (ORR), defined as the rate of complete …	Alaunos Therapeutics	Female	18 Years and older В (Adult, Older Adult)	Phase 1|Phase 2	9	Industry	Interventional	Allocation: N/A|Intervention Model: Single Group Assignment|Masking: None (Open Label)|Primary Purpose: Treatment	ATI001-203	July 2015	July 2016	July 2016	April 22, 2015		October 8, 2021	Memorial Sloan Kettering Cancer Center, New York, New York, United States		https://ClinicalTrials.gov/show/NCT02423902
Cell	9	Completed	NCT01082926	Phase I Study of Cellular Immunotherapy for Recurrent/Refractory Malignant Glioma Using Intratumoral Infusions of GRm13Z40-2, An Allogeneic CD8+ Cytolitic T-Cell Line Genetically Modified to Express the IL 13-Zetakine and HyTK and to be Resistant to Glucocorticoids, in Combination With Interleukin-2	intratumoral GRm13Z40-2 therapeutic allogeneic lymphocytes	No Results Available	Anaplastic Astrocytoma|Anaplastic Ependymoma|Anaplastic Meningioma|Anaplastic Oligodendroglioma|Brain Stem Glioma|Ependymoblastoma|Giant Cell Glioblastoma|Glioblastoma|Gliosarcoma|Grade III Meningioma|Meningeal Hemangiopericytoma|Mixed Glioma|Pineal Gland Astrocytoma|Brain Tumor	Biological: therapeutic allogeneic lymphocytes|Biological: aldesleukin|Other: laboratory biomarker analysis|Procedure: positron emission tomography	Safety of GRm13Z40-2 CTL CNS loco-regional cellular immunotherapy|Safety of convection enhanced delivery (CED) of recombinant human Interleukin-2 (rhuIL-2) used in conjunction with GRm13Z40-2 CTL adoptive transfer|Toxicity as assessed by NCI CTCAE version 4.0|Ability of 9-(4-fluoro-3-hydroxy-methyl-butyl) guanine (18FHBG) positron emission tomography PET to image GRm13Z40-2 CTLs|Impact of concurr…	City of Hope Medical Center	All	18 Years to 70 Years В (Adult, Older Adult)	Phase 1	6	Other	Interventional	Allocation: Non-Randomized|Intervention Model: Single Group Assignment|Masking: None (Open Label)|Primary Purpose: Treatment	07082|NCI-2010-00303	May 2010	September 2013	September 2013	March 9, 2010		June 8, 2015	City of Hope, Duarte, California, United States		https://ClinicalTrials.gov/show/NCT01082926
Adjuvant	10	Completed	NCT03262103	Neoadjuvant HiltonolВ® (PolyICLC) for Prostate Cancer		No Results Available	Prostate Cancer	Biological: Intratumoral (IT) Poly ICLC 0.5 mg|Biological: Intratumoral (IT) Poly ICLC 1.0 mg|Biological: Intramuscular (IM) Poly ICLC|Procedure: Radical Prostatectomy	Dose-Limiting Toxicity level|Number of adverse events|Time to PSA progression	Ashutosh Kumar Tewari|Oncovir, Inc.|Icahn School of Medicine at Mount Sinai	Male	18 Years and older В (Adult, Older Adult)	Phase 1	13	Other|Industry	Interventional	Allocation: Non-Randomized|Intervention Model: Sequential Assignment|Masking: None (Open Label)|Primary Purpose: Treatment	GCO 15-2081	June 16, 2017	May 6, 2022	May 6, 2022	August 25, 2017		September 10, 2022	Icahn School of Medicine at Mount Sinai, New York, New York, United States		https://ClinicalTrials.gov/show/NCT03262103
Cell	11	Completed	NCT01144247	Cellular Immunotherapy Study for Brain Cancer	CTL	No Results Available	Gliomas|Anaplastic Astrocytoma|Anaplastic Oligodendroglioma|Anaplastic Mixed Glioma|Glioblastoma Multiforme|Malignant Meningioma	Drug: alloreactive CTL	Number of patients with adverse events as a measure of safety and tolerability|Maximum tolerated dose	Jonsson Comprehensive Cancer Center|National Institutes of Health (NIH)|National Cancer Institute (NCI)	All	18 Years and older В (Adult, Older Adult)	Phase 1	10	Other|NIH	Interventional	Allocation: N/A|Intervention Model: Single Group Assignment|Masking: None (Open Label)|Primary Purpose: Treatment	UCLA 07-09-008|R01CA125244	July 2010	July 2015	July 2015	June 15, 2010		May 27, 2016	University of California, Los Angeles, Los Angeles, California, United States		https://ClinicalTrials.gov/show/NCT01144247
Cell/Adjuvant	12	Completed	NCT02380443	AlloStimВ® Immunotherapy Dosing Alone or in Combination With Cryoablation in Metastatic Colorectal Cancer	bioengineered allogeneic immune cells (AlloStim®) into the lesion as an adjuvant	No Results Available	Colorectal Cancer Metastatic	Biological: AlloStim|Procedure: Cryoablation	To determine the safety of increased frequency of dosing (Part 1) (whether a Dose Limiting Toxicity (DLT) has occurred)|To evaluate the anti-tumor effect of AlloStim combined with cryoablation at the new proposed dose and frequency schedule (Part 2)|To assess change from baseline in Health-Related Quality of Life (HRQoL)	Immunovative Therapies, Ltd.	All	18 Years to 80 Years В (Adult, Older Adult)	Phase 2	12	Industry	Interventional	Allocation: Non-Randomized|Intervention Model: Single Group Assignment|Masking: None (Open Label)|Primary Purpose: Treatment	ITL-019-CORK-CRYVAC	September 2016	March 2018	September 2018	March 5, 2015		January 22, 2020	Banner MD Anderson Medical Center, Gilbert, Arizona, United States		https://ClinicalTrials.gov/show/NCT02380443
	13	Completed	NCT00953849	Vitamin D Plus Celecoxib Therapy to Stimulate Intratumoral Immune Reactivity	Intratumoral Immune Reactivity	Has Results	Mouth Neoplasms	Drug: Celecoxib|Drug: Calcitriol|Drug: Celecoxib plus Calcitriol	Change in IL-2 Levels|Change in IFN-gamma Levels|Change in GM-CSF|Change in IL-6 Levels.	VA Office of Research and Development	All	18 Years to 85 Years В (Adult, Older Adult)	Phase 1|Phase 2	21	U.S. Fed	Interventional	Allocation: Randomized|Intervention Model: Parallel Assignment|Masking: None (Open Label)|Primary Purpose: Basic Science	CLIN-003-09S	November 2009	December 2015	December 2015	August 6, 2009	December 21, 2016	March 7, 2017	Ralph H. Johnson VA Medical Center, Charleston, SC, Charleston, South Carolina, United States		https://ClinicalTrials.gov/show/NCT00953849
Adjuvant	14	Completed	NCT01924689	Safety Study of Intratumoral Injection of Clostridium Novyi-NT Spores to Treat Patients With Solid Tumors That Have Not Responded to Standard Therapies	intratumoral administration of Clostridium Novyi-NT spores, provides unequivocal evidence of an innate immune response.	Has Results	Solid Tumor Malignancies	Biological: Clostridium novyi-NT spores	Number of Patients With Treatment-emergent Adverse Events (TEAE)|Number of Patients With Adverse Events Qualified as Dose Limiting Toxicities (DLTs)|Percentage Change in Tumor Size From Baseline of the Target Injected Lesion, Measured by Computed Tomography (CT) Scans or Magnetic Resonance Imaging (MRI) Scans|Number of Patients With RECIST Assessment on the Injected Lesion|Number of Patients With…	BioMed Valley Discoveries, Inc	All	18 Years and older В (Adult, Older Adult)	Phase 1	24	Industry	Interventional	Allocation: N/A|Intervention Model: Single Group Assignment|Masking: None (Open Label)|Primary Purpose: Treatment	BVDCNV2	October 2013	October 31, 2017	October 31, 2017	August 16, 2013	September 9, 2019	September 9, 2019	Washington University School of Medicine, Saint Louis, Missouri, United States|Albert Einstein College of Medicine, Bronx, New York, United States|Memorial Sloan Kettering Cancer Center, New York, New York, United States|Cleveland Clinic Foundation, Cleveland, Ohio, United States|UT M.D. Anderson Cancer Center, Houston, Texas, United States	Study Protocol, https://ClinicalTrials.gov/ProvidedDocs/89/NCT01924689/Prot_000.pdf|"Statistical Analysis Plan", https://ClinicalTrials.gov/ProvidedDocs/89/NCT01924689/SAP_001.pdf	https://ClinicalTrials.gov/show/NCT01924689
Cell	15	Completed	NCT01347034	Radiation Therapy and Intratumoral Autologous Dendritic Cells in Soft Tissue Sarcomas (STS)		Has Results	Soft Tissue Sarcoma	Procedure: External Beam Radiation Therapy (RT)|Biological: Autologous Dendritic Cells	Number of Participants With Enhanced T Lymphocyte Immune Response Specific for Soft Tissue Sarcoma Tumor Associated Antigens(STS-TAAs)|Number of Participants With Treatment Emergent Serious Adverse Events (SAEs) and Adverse Events (AEs)	H. Lee Moffitt Cancer Center and Research Institute|University of Florida	All	18 Years and older В (Adult, Older Adult)	Phase 2	20	Other	Interventional	Allocation: Non-Randomized|Intervention Model: Parallel Assignment|Masking: None (Open Label)|Primary Purpose: Treatment	MCC-16441	January 2011	August 2013	April 2016	May 4, 2011	August 8, 2014	May 23, 2016	Shands University of Florida Department of Radiation Oncology, Gainesville, Florida, United States|Shands Jacksonville Department of Radiation Oncology, Jacksonville, Florida, United States|H. Lee Moffitt Cancer Center and Research Institute, Tampa, Florida, United States		https://ClinicalTrials.gov/show/NCT01347034
Viral	16	Completed	NCT02197169	DNX-2401 With Interferon Gamma (IFN-Оі) for Recurrent Glioblastoma or Gliosarcoma Brain Tumors	Single intratumoral injection of DNX-2401	No Results Available	Glioblastoma or Gliosarcoma	Drug: Single intratumoral injection of DNX-2401|Drug: Interferon-gamma	Objective response rate (ORR) determined by MRI scan review|Incidence and severity of adverse events, including changes in laboratory test results and neurological examination findings|Number of subjects with immunological and biological effects after DNX-2401 with Interferon gamma|Changes in steroid use (dose and frequency) and clinical and KPS status overall and per study arm assignment|Overall…	DNAtrix, Inc.	All	18 Years and older В (Adult, Older Adult)	Phase 1	37	Industry	Interventional	Allocation: Randomized|Intervention Model: Parallel Assignment|Masking: None (Open Label)|Primary Purpose: Treatment	2401BT-IFN-001	September 11, 2014	March 15, 2018	March 15, 2018	July 22, 2014		July 16, 2018	Moffitt Cancer Center, Tampa, Florida, United States|The Ohio State University, Columbus, Ohio, United States|Baylor University: Charles A. Sammons Cancer Center, Dallas, Texas, United States|UT MD Anderson Cancer Center, Houston, Texas, United States		https://ClinicalTrials.gov/show/NCT02197169
Cell	17	Completed	NCT00815607	Trial of an Intratumoral Injections of INXN-3001 in Subjects With Stage III or IV Melanoma	Intratumoral Injections of Adenoviral Transduced Autologous Dendritic Cells Engineered to Express hIL-12(INXN-3001) in Response to an Oral Activator Ligand	No Results Available	Melanoma	Drug: INXN-1001|Biological: INXN-3001	Physical examinations, vital signs, serum chemistry, urinalysis, hematology, adverse events, and objective response rate, as assessed by diagnostic CT scans|PK of oral Activator Ligand, Immunologic responses, particularly frequency of CTLs and Tregs and hIL-12 and other cytokine levels in injected target tumor(s) and in peripheral blood, Efficacy.	Alaunos Therapeutics	All	18 Years to 75 Years В (Adult, Older Adult)	Phase 1	12	Industry	Interventional	Allocation: N/A|Intervention Model: Single Group Assignment|Masking: None (Open Label)|Primary Purpose: Treatment	RTS-M101B'|NIH OBA 0710-881	April 2009	January 2013	January 2013	December 30, 2008		July 18, 2013	The Angeles Clinic and Research Institute, Santa Monica, California, United States|Helen F. Graham Cancer Center, Newark, Delaware, United States|вЂў Nancy N. and J.C. Lewis Cancer Center & Research Pavilion at St. Joseph/Candles, Savannah, Georgia, United States|Oncology Specialists, S.C., Park Ridge, Illinois, United States|Goshen Clinic, Goshen, Indiana, United States|Billings Clinic, Billings…		https://ClinicalTrials.gov/show/NCT00815607
Viral	18	Completed	NCT01956734	Virus DNX2401 and Temozolomide in Recurrent Glioblastoma	DNX-2401 (tasadenoturev, or Delta-24-RGD [arginine–glycine–aspartic acid]) is an oncolytic adenovirus that selectively replicates in tumor cells	No Results Available	Glioblastoma Multiforme|Recurrent Tumor	Procedure: DNX2401 and Temozolomide	Number of participans with adverse events|Efficacy of the combination: PFS6 and OS12|Tumor response|Quality of life|Biological response	Clinica Universidad de Navarra, Universidad de Navarra|DNAtrix, Inc.	All	18 Years to 75 Years В (Adult, Older Adult)	Phase 1	31	Other|Industry	Interventional	Allocation: N/A|Intervention Model: Single Group Assignment|Masking: None (Open Label)|Primary Purpose: Treatment	D24GBM EudraCT: 2011-005935-21	September 2013	December 2015	March 2017	October 8, 2013		October 24, 2017	Clinica Universidad de Navarra, Pamplona, Navarra, Spain		https://ClinicalTrials.gov/show/NCT01956734
Viral	19	Completed	NCT00096551	A Phase I Feasibility Study of an Intraprostatic PSA-Based Vaccine in Men With Prostate Cancer With Local Failure Following Radiotherapy or Cryotherapy or Clinical Progression on Androgen Deprivation Therapy in the Absence of Local Definitive Therapy	Intratumoral vaccines of recombinant fowlpox vectors appear to be more potent in inducing antitumor effects than the s.c. route of administration, especially when the recombinant rF-vector given intratumorally is preceded by a rV-recombinant given s.c.	No Results Available	Prostatic Neoplasms	Drug: Recombinant Vaccinia-PSA(L155)/TRICOM (PROSTVAC-V/TRICOM)|Drug: Recombinant Fowlpox-PSA(L155)/TRICOM (PROSTVAC-F/TRICOM)|Drug: Recombinant Fowlpox-GM-CSF		National Cancer Institute (NCI)|National Institutes of Health Clinical Center (CC)	Male	18 Years and older В (Adult, Older Adult)	Phase 1	21	NIH	Interventional	Primary Purpose: Treatment	050017|05-C-0017	November 1, 2004	December 11, 2009	July 25, 2011	November 10, 2004		July 2, 2017	National Institutes of Health Clinical Center, 9000 Rockville Pike, Bethesda, Maryland, United States		https://ClinicalTrials.gov/show/NCT00096551
Viral	20	Completed	NCT02562755	Hepatocellular Carcinoma Study Comparing Vaccinia Virus Based Immunotherapy Plus Sorafenib vs Sorafenib Alone	I/T Pexa Vec (Vaccinia GM CSF / Thymidine Kinase-Deactivated Virus) Followed by Sorafenib Versus Sorafenib in Patients With Advanced Hepatocellular Carcinoma (HCC) Without Prior Systemic Therapy	Has Results	Hepatocellular Carcinoma (HCC)	Biological: Pexastimogene Devacirepvec (Pexa Vec)|Drug: Sorafenib	Overall Response Rate (ORR)	SillaJen, Inc.	All	18 Years and older В (Adult, Older Adult)	Phase 3	459	Industry	Interventional	Allocation: Randomized|Intervention Model: Parallel Assignment|Masking: None (Open Label)|Primary Purpose: Treatment	JX594-HEP024	October 2015	July 2020	July 2020	September 29, 2015	December 16, 2020	December 16, 2020	University of Alabama, Birmingham, Alabama, United States|Mayo Clinic Arizona, Scottsdale, Arizona, United States|UC Irvine Medical Center, Orange, California, United States|Stanford University School of Medicine, Palo Alto, California, United States|University of Florida Shands Hospital, Gainesville, Florida, United States|University of Chicago, Chicago, Illinois, United States|University of Kan…	Study Protocol, https://ClinicalTrials.gov/ProvidedDocs/55/NCT02562755/Prot_000.pdf|"Statistical Analysis Plan", https://ClinicalTrials.gov/ProvidedDocs/55/NCT02562755/SAP_001.pdf	https://ClinicalTrials.gov/show/NCT02562755
Cell	21	Completed	NCT02677155	Sequential Intranodal Immunotherapy (SIIT) Combined With Anti-PD1 (Pembrolizumab) in Follicular Lymphoma	The treatment targets single lymphoma nodes with radiation (single fraction of 8 Gy), ultrasound-guided injections of autologous DCs , low-dose rituximab (5 mg) and GM-CSF sc. This sequential intranodal immunotherapy (SIIT) is repeated three times, targeting different lymphoma nodes.	No Results Available	Follicular Lymphoma	Radiation: Radiotherapy|Biological: Rituximab|Biological: Autologous dendritic cells|Biological: GM-CSF|Biological: Pembrolizumab	Overall response rate|Duration of response|Progression-free survival|Time to next treatment|Overall survival|Change in total tumor volume|Safety: Number of participants with treatment-related adverse events as assessed by CTCAE v4.0|Anti-tumor T cell responses in blood	Oslo University Hospital|Norwegian Cancer Society|Merck Sharp & Dohme LLC	All	18 Years and older В (Adult, Older Adult)	Phase 2	10	Other|Industry	Interventional	Allocation: N/A|Intervention Model: Single Group Assignment|Masking: None (Open Label)|Primary Purpose: Treatment	Lymvac-2	January 2016	February 2021	February 2021	February 9, 2016		March 1, 2021	Oslo University Hospital Radiumhospitalet, Oslo, Norway		https://ClinicalTrials.gov/show/NCT02677155
mAb	22	Completed	NCT02379741	ADC-1013 First-in-Human Study	determine whether ADC-1013 (an agonistic human monoclonal IgG1 anti-CD40 antibody) is safe and tolerable when administered intratumorally (as repeated injections directly into the tumor tissue) or intravenously (as repeated doses directly into a vein) in patients with advanced solid tumors.	No Results Available	Neoplasms|Solid Tumors	Biological: ADC-1013	Safety and tolerability of increasing doses of ADC-1013, assessed by medical review of AE reports and vital signs measurements (blood pressure, pulse rate, body temperature), physical examinations, ECGs and clinical laboratory tests.|Pharmacokinetics of ADC-1013 after single and repeated administrations assessed by the following parameters: Cmax, Tmax, elimination half-life, AUC0-в€ћ, total serum…	Alligator Bioscience AB	All	18 Years and older В (Adult, Older Adult)	Phase 1	24	Industry	Interventional	Allocation: Non-Randomized|Intervention Model: Parallel Assignment|Masking: None (Open Label)|Primary Purpose: Treatment	A-14-1013-C-01	April 2015	March 8, 2017	March 8, 2017	March 5, 2015		March 27, 2017	Center for Cancer Research, Department of Oncology, Herlev Hospital, Herlev, Denmark|Kliniska prГ¶vningsenheten (KPE), Karolinska University Hospital, Solna, Stockholm, Sweden|Department of Oncology, Uppsala University Hospital, Uppsala, Sweden|Department of Oncology, Queen Elisabeth Hospital, Edgbaston, Birmingham, United Kingdom|The Clatterbridge Cancer Centre, Bebington, Wirral, United Kingdom		https://ClinicalTrials.gov/show/NCT02379741
Adjuvant	23	Completed	NCT03655756	pDNA Intralesional Cancer Vaccine for Cutaneous Melanoma	IFx-Hu2.0 (plasmid DNA encoding the streptococcal membrane protein, Emm55, contained within a cationic polymer) primes innate and antigen dependent responses. The target dose will be 100 μg of plasmid DNA per lesion injected at a final dose volume of 200 μL per lesion.	Has Results	Cutaneous Melanoma, Stage III|Cutaneous Melanoma, Stage IV	Biological: IFx-Hu2.0	Number of Participants With Serious Adverse Events (SAEs) and/or Dose Limiting Toxicities (DLTs)|Antitumor Response Induced by IFx-Hu2.0 Per RECIST v1.1 for Target Lesions.	Morphogenesis, Inc.|H. Lee Moffitt Cancer Center and Research Institute	All	18 Years and older В (Adult, Older Adult)	Early Phase 1	7	Industry|Other	Interventional	Allocation: N/A|Intervention Model: Single Group Assignment|Masking: None (Open Label)|Primary Purpose: Treatment	CM 2017-01	November 5, 2018	July 10, 2020	November 30, 2020	August 31, 2018	August 8, 2022	August 8, 2022	H. Lee Moffitt Cancer Center, Tampa, Florida, United States	Study Protocol and Statistical Analysis Plan, https://ClinicalTrials.gov/ProvidedDocs/56/NCT03655756/Prot_SAP_000.pdf|"Informed Consent Form", https://ClinicalTrials.gov/ProvidedDocs/56/NCT03655756/ICF_001.pdf	https://ClinicalTrials.gov/show/NCT03655756
Toxin+	24	Completed	NCT00088400	Comparison of TransMID vs Standard Treatment of Cancerous Brain Tumors	intratumoral/interstitial therapy with TransMID. TransMID is a drug that is a combination of a protein called transferrin and a poison called diphtheria toxin. Cancer cells need iron in order to continue to grow. They need more iron than normal cells. Transferrin helps cells to take up available iron. So the cancer cells are attached to the transferrin in TransMID, and the diphtheria poison kills…	No Results Available	Glioblastoma	Drug: TransMID		National Institute of Neurological Disorders and Stroke (NINDS)|National Institutes of Health Clinical Center (CC)	All	Child, Adult, Older Adult	Phase 3	30	NIH	Interventional	Primary Purpose: Treatment	040244|04-N-0244	July 2004		November 2005	July 26, 2004		September 22, 2016	National Institute of Neurological Disorders and Stroke (NINDS), Bethesda, Maryland, United States		https://ClinicalTrials.gov/show/NCT00088400
Cell/Adjuvant	25	Completed	NCT00365872	External Beam Radiation With Intratumoral Injection of Dendritic Cells As Neo-Adjuvant Treatment for Sarcoma	intratumoral injection of dendritic cells (white blood cells) as neo-adjuvant treatment	Has Results	Soft Tissue Sarcoma	Biological: Dendritic Cell (DC) Injections|Procedure: Radiation therapy|Procedure: Complete Resection - Surgery for tumor removal	Overall Response Rate (ORR)|Occurrence of Significant (>/= Grade 2) Toxicity|Occurrence of Postoperative Wound Complications|Participants With No Evidence of Disease at Follow-up	H. Lee Moffitt Cancer Center and Research Institute|Cancer Treatment Research Foundation	All	18 Years and older В (Adult, Older Adult)	Phase 2	17	Other	Interventional	Allocation: N/A|Intervention Model: Single Group Assignment|Masking: None (Open Label)|Primary Purpose: Treatment	MCC-14497	May 2006	June 2012	June 2012	August 18, 2006	January 6, 2014	March 23, 2017	H. Lee Moffitt Cancer Center & Research Institute, Tampa, Florida, United States		https://ClinicalTrials.gov/show/NCT00365872
Adjuvant	26	Completed	NCT01976585	In Situ Vaccine for Low-Grade Lymphoma: Combination of Intratumoral Flt3L and Poly-ICLC With Low-Dose Radiotherapy	Intratumoral Injection of rhuFlt3L/CDX-301 and Poly-ICLC in Combination With Low-Dose Radiotherapy. Intratumoral administration of TLR agonists - referred to as 'in situ vaccination' - for patients with low-grade lymphoma, induction of anti-tumor CD8 T cell responses and partial and complete remissions of patients' non-irradiated sites of disease with complete remissions lasting from months to mo…	No Results Available	Low-Grade B-cell Lymphoma	Drug: rhuFlt3L/CDX-301|Drug: Poly-ICLC	response rate|safety profile|tumor-specific immune response	Joshua Brody|Celldex Therapeutics|Icahn School of Medicine at Mount Sinai	All	18 Years and older В (Adult, Older Adult)	Phase 1|Phase 2	21	Other|Industry	Interventional	Allocation: N/A|Intervention Model: Single Group Assignment|Masking: None (Open Label)|Primary Purpose: Treatment	GCO 13-1347	January 3, 2014	November 20, 2020	November 20, 2020	November 6, 2013		September 22, 2022	Icahn School of Medicine at Mount Sinai, New York, New York, United States		https://ClinicalTrials.gov/show/NCT01976585
Viral	27	Completed	NCT02798406	Combination Adenovirus + Pembrolizumab to Trigger Immune Virus Effects	recurrent glioblastoma or gliosarcoma tumor responds to one injection of DNX-2401, a genetically modified oncolytic adenovirus, when delivered directly into the tumor followed by the administration of intravenous pembrolizumab	No Results Available	Brain Cancer|Brain Neoplasm|Glioma|Glioblastoma|Gliosarcoma|Malignant Brain Tumor|Neoplasm, Neuroepithelial|Neuroectodermal Tumors|Neoplasm by Histologic Type|Neoplasm, Nerve Tissue|Nervous System Diseases	Biological: DNX-2401|Biological: pembrolizumab	Objective response rate (ORR)|Overall survival (OS)|Time to tumor response|Duration of response	DNAtrix, Inc.|Merck Sharp & Dohme LLC	All	18 Years and older В (Adult, Older Adult)	Phase 2	49	Industry	Interventional	Allocation: N/A|Intervention Model: Single Group Assignment|Masking: None (Open Label)|Primary Purpose: Treatment	2401BT-002P	October 6, 2016	March 17, 2021	June 30, 2021	June 14, 2016		July 15, 2021	University of Arkansas for Medical Sciences (UAMS), Little Rock, Arkansas, United States|UCLA Medical Center, Los Angeles, California, United States|Northwestern University, Chicago, Illinois, United States|University of Minnesota Neurosurgery, Minneapolis, Minnesota, United States|Rutgers Cancer Institute of New Jersey, New Brunswick, New Jersey, United States|Memorial Sloan Kettering Cancer Cen…		https://ClinicalTrials.gov/show/NCT02798406
	28	Completed	NCT03267641	Prospective Cohort Study on the Clinical Trajectory of Resected Hepatocellular Carcinoma	Intra-Tumoural Genomic Heterogeneity	No Results Available	Hepatocellular Carcinoma		Time to recurrence|Disease-free Survival|Disease-free Specific Survival|Overall Survival	National Cancer Centre, Singapore|Singapore Clinical Research Institute	All	21 Years to 80 Years В (Adult, Older Adult)		86	Other	Observational	Observational Model: Cohort|Time Perspective: Prospective	AHCC07	May 16, 2016	March 31, 2021	March 31, 2021	August 30, 2017		June 9, 2021	University Malaya Medical Centre, Kuala Lumpur, Malaysia|The Medical Centre, Philippines, Manila, Philippines|National University Hospital, Singapore, Singapore|Singapore General Hospital, Singapore, Singapore|National Cancer Centre Singapore, Singapore, Singapore|National Cancer Institute Thailand, Bangkok, Thailand		https://ClinicalTrials.gov/show/NCT03267641
Virus-like	29	Completed	NCT03084640	Phase 1B Study Evaluating Alternative Routes of Administration of CMP-001 in Combination With Pembrolizumab in Participants With Advanced Melanoma	Part 2 will assess the safety and preliminary evidence of antitumor activity of CMP-001, administered both SC and intratumoral (IT) when given in combination with pembrolizumab. CMP-001, also known as vidutolimod, is a virus-like particle containing a TLR9 agonist that is showing promise in early clinical trials. PMID: 34083419	No Results Available	Malignant Melanoma	Drug: CMP-001|Drug: Pembrolizumab	Part 1: Dose-Escalation Phase: RP2D of CMP-001 When Administered SC and Given in Combination With Pembrolizumab|Part 2: Number of Participants With Treatment-Emergent Adverse Events (TEAEs)|Part 1 Dose Escalation and Dose Expansion: Number of Participants With TEAEs|Part 1 Dose Escalation and Dose Expansion, and Part 2: Oral Temperature|Part 1 Dose Escalation and Dose Expansion, and Part 2: Respi…	Regeneron Pharmaceuticals	All	18 Years and older В (Adult, Older Adult)	Phase 1	30	Industry	Interventional	Allocation: Non-Randomized|Intervention Model: Sequential Assignment|Masking: None (Open Label)|Primary Purpose: Treatment	CMP-001-002	May 4, 2017	July 2, 2021	September 30, 2021	March 21, 2017		August 3, 2022	University of California, Los Angeles, Los Angeles, California, United States|University of Colorado, Aurora, Colorado, United States|University of Iowa Hospitals and Clinics, Iowa City, Iowa, United States|University of Pittsburgh Medical Center - Cancer Center, Pittsburgh, Pennsylvania, United States		https://ClinicalTrials.gov/show/NCT03084640
Viral	30	Completed	NCT01740297	Ipilimumab With or Without Talimogene Laherparepvec in Unresected Melanoma	Talimogene laherparepvec is the world's first approved oncolytic immunotherapy	Has Results	Melanoma	Drug: Talimogene laherparepvec|Drug: Ipilimumab	Phase 1b: Number of Participants With Dose-limiting Toxicities|Phase 2: Objective Response Rate|Phase 1b: Objective Response Rate|Phase 2: Best Overall Response|Phase 2: Disease Control Rate|Phase 2: Durable Response Rate|Phase 2: Time to Response|Phase 2: Duration of Response|Phase 2: Progression-free Survival|Phase 2: Resection Rate|Phase 2: Overall Survival|Phase 2: Kaplan-Meier Estimate of Pe…	Amgen	All	18 Years and older В (Adult, Older Adult)	Phase 1|Phase 2	217	Industry	Interventional	Allocation: Randomized|Intervention Model: Parallel Assignment|Masking: None (Open Label)|Primary Purpose: Treatment	20110264|2012-000307-32	February 7, 2013	August 23, 2016	March 9, 2021	December 4, 2012	October 9, 2017	March 10, 2022	Research Site, Tucson, Arizona, United States|Research Site, Beverly Hills, California, United States|Research Site, Los Angeles, California, United States|Research Site, Los Angeles, California, United States|Research Site, Los Angeles, California, United States|Research Site, San Francisco, California, United States|Research Site, Santa Rosa, California, United States|Research Site, Aurora, Col…		https://ClinicalTrials.gov/show/NCT01740297
Viral	31	Completed	NCT03153085	A Study of Combination With TBI-1401(HF10) and Ipilimumab in Japanese Patients With Unresectable or Metastatic Melanoma	intratumoral injections of TBI-1401(HF10) at 1x10^7 TCID50/mL in combination with intravenous infusions of 3mg/kg ipilimumab in Japanese patients. Oncolytic herpes simplex virus HF10	No Results Available	Melanoma Stage III|Melanoma Stage IV	Biological: TBI-1401(HF10)|Drug: Ipilimumab	Best overall response rate (BORR) by irRC|Best overall response rate (BORR) by mWHO response criteria|Best overall response rate (BORR) by RECIST version 1.1|Objective response rate (ORR) by irRC|Objective response rate (ORR) by mWHO|Objective response rate (ORR) by RECIST version 1.1|Adverse event summaries, vital signs, and laboratory parameters to evaluate the safety and tolerability.|Progress…	Takara Bio Inc.	All	20 Years and older В (Adult, Older Adult)	Phase 2	28	Industry	Interventional	Allocation: N/A|Intervention Model: Single Group Assignment|Masking: None (Open Label)|Primary Purpose: Treatment	TBI1401-02	May 25, 2017	June 30, 2018	December 14, 2018	May 15, 2017		March 5, 2020	Clinical Site, Nagakute, Aichi, Japan|Clinical Site, Nagoya, Aichi, Japan|Clinical Site, Kurume, Fukuoka, Japan|Clinical Site, Sapporo, Hokkaido, Japan|Clinical Site, Tsukuba, Ibaraki, Japan|Clinical Site, ChЕ«ЕЌku, Tokyo, Japan|Clinical Site, ChЕ«ЕЌ, Yamanashi, Japan|Clinical Site, Fukuoka, Japan|Clinical Site, Kumamoto, Japan|Clinical Site, Niigata, Japan|Clinical Site, Shizuoka, Japan|Clinical…		https://ClinicalTrials.gov/show/NCT03153085
	1	Active, not recruiting	NCT03670056	Ipilimumab and Nivolumab in Recurrent Extensive Stage Small Cell Lung Cancer After Receiving Platinum-based Chemotherapy	ratio of intratumoral Teff/Treg cells	No Results Available	Small Cell Lung Cancer	Drug: Combination immunotherapy with Ipilimumab and Nivolumab	Change in the ratio of Teff/Treg cells|Response rate|Duration of response|Progression-free survival	Yale University|Bristol-Myers Squibb	All	18 Years and older В (Adult, Older Adult)	Phase 2	25	Other|Industry	Interventional	Allocation: N/A|Intervention Model: Single Group Assignment|Masking: None (Open Label)|Primary Purpose: Treatment	2000023361|CA209-9YT	December 6, 2018	December 31, 2022	June 1, 2023	September 13, 2018		April 25, 2022	Yale University, Yale Cancer Center, New Haven, Connecticut, United States		https://ClinicalTrials.gov/show/NCT03670056
Virus-like/Adjuvant	2	Active, not recruiting	NCT03507699	Combined Immunotherapy and Radiosurgery for Metastatic Colorectal Cancer	Patients treated with radiosurgery to liver metastases (completed by day 1), followed by a priming dose of subcutaneous CMP-001 (day 1 ± 4 days). CMP-001 is a CpG-A oligonucleotide TLR9 agonist in a virus-like particle	No Results Available	Colorectal Neoplasms Malignant|Liver Metastases	Radiation: Liver radiation therapy|Drug: Nivolumab Injection [Opdivo]|Drug: Ipilimumab Injection [Yervoy]|Drug: CMP-001	Number of participants with serious dose-limiting treatment-related adverse events as assessed by CTCAE v5.0|Response rate as assessed by RECIST v1.1|Progression free survival	Sheba Medical Center|Checkmate Pharmaceuticals|Bristol-Myers Squibb	All	18 Years and older В (Adult, Older Adult)	Phase 1	19	Other|Industry	Interventional	Allocation: Non-Randomized|Intervention Model: Sequential Assignment|Masking: None (Open Label)|Primary Purpose: Treatment	4465-17-SMC|CA209-991	December 15, 2018	August 18, 2021	May 25, 2022	April 25, 2018		May 23, 2022	Sheba Medical Center, Ramat Gan, Israel		https://ClinicalTrials.gov/show/NCT03507699
Adjuvant	3	Active, not recruiting	NCT04270864	Intratumoral Tilsotolimod, a TLR-9 Agonist, Together With Intratumoral Ipilimumab and Intravenous Nivolumab in Patients With Advanced Cancers	intratumoral tilsotolimod in combination with intratumoral ipilimumab and intravenous nivolumab. Tilsotolimod, a TLR-9 Agonist	No Results Available	Advanced Cancer	Drug: Ipilimumab|Drug: Nivolumab|Drug: Tilsotolimod	Describe the incidence of Dose-intensity limiting toxicities	Gustave Roussy, Cancer Campus, Grand Paris	All	18 Years and older В (Adult, Older Adult)	Phase 1	72	Other	Interventional	Allocation: Non-Randomized|Intervention Model: Single Group Assignment|Masking: None (Open Label)|Primary Purpose: Treatment	2018-004790-26|2019/2840	April 10, 2020	February 2024	February 2026	February 17, 2020		February 14, 2023	Gustave Roussy, Villejuif, Val De Marne, France		https://ClinicalTrials.gov/show/NCT04270864
mAb	4	Active, not recruiting	NCT02988960	A Study of ABBV-927 and ABBV-181, an Immunotherapy, in Participants With Advanced Solid Tumors	Participants with solid tumors will receive escalating intratumoral (IT) doses of ABBV-927. ABBV-927 is an agonistic anti-CD40 monoclonal antibody	No Results Available	Advanced Solid Tumors Cancer	Drug: ABBV-927|Drug: ABBV-181	Maximum tolerated dose (MTD) or recommended Phase 2 dose (RPTD) for ABBV-927 when administered as monotherapy or as combination therapy with ABBV-181|Time to Cmax (Tmax) of ABBV-927|Maximum observed serum concentration (Cmax) of ABBV-927|Terminal-Phase Elimination Rate Constant (ОІ) of ABBV-927|Terminal half-life (t1/2) of ABBV-927|Area under the serum concentration-time curve (AUCt) of ABBV-927|…	AbbVie	All	18 Years and older В (Adult, Older Adult)	Phase 1	163	Industry	Interventional	Allocation: Non-Randomized|Intervention Model: Sequential Assignment|Masking: None (Open Label)|Primary Purpose: Treatment	M15-862|2016-002219-16	February 22, 2017	February 10, 2024	February 10, 2024	December 12, 2016		February 14, 2023	The Angeles Clinic and Researc /ID# 156324, Los Angeles, California, United States|The University of Chicago Medical Center /ID# 155264, Chicago, Illinois, United States|Massachusetts General Hospital /ID# 155267, Boston, Massachusetts, United States|Carolina BioOncology Institute /ID# 155265, Huntersville, North Carolina, United States|Tennessee Oncology-Nashville Centennial /ID# 158654, Nashvil…		https://ClinicalTrials.gov/show/NCT02988960
Viral	5	Active, not recruiting	NCT00669734	Vaccine Therapy and Sargramostim in Treating Patients With Pancreas Cancer That Cannot Be Removed By Surgery	Patients receive falimarev vaccine intratumorally using endoscopic ultrasound guidance on day 1. Patients also receive inalimarev vaccine SC on day 1 and sargramostim SC on days 1-4. falimarev: A cancer vaccine comprised of a recombinant fowlpox viral vector encoding the carcinoembryonic antigen (CEA), MUC-1, a transmembrane glycoprotein secreted by glandular epithelial tissues, and TRICOM, compr…	No Results Available	Locally Advanced Pancreatic Adenocarcinoma|Pancreatic Acinar Cell Carcinoma|Pancreatic Ductal Adenocarcinoma|Stage III Pancreatic Cancer AJCC v6 and v7|Stage IV Pancreatic Cancer AJCC v6 and v7	Biological: Falimarev|Biological: Inalimarev|Other: Laboratory Biomarker Analysis|Biological: Sargramostim	MTD of falimarev, defined as the dose level that 0/6 or 1/6 patients experience dose-limiting toxicity (DLT) and that at least 2/3 or 2/6 patients treated with the next higher dose have had DLT|Mean number of positive cells per high power field in the pancreas biopsy specimen|T cell proliferation|Cytokine production	National Cancer Institute (NCI)	All	18 Years and older В (Adult, Older Adult)	Phase 1	18	NIH	Interventional	Allocation: N/A|Intervention Model: Single Group Assignment|Masking: None (Open Label)|Primary Purpose: Treatment	NCI-2012-03111|070602|7606|P30CA072720|U01CA132194|UM1CA186716	February 1, 2010	September 2, 2021	April 14, 2023	April 30, 2008		November 17, 2022	Rutgers Cancer Institute of New Jersey, New Brunswick, New Jersey, United States		https://ClinicalTrials.gov/show/NCT00669734
Adjuvant	6	Active, not recruiting	NCT02668770	Ipilimumab (Immunotherapy) and MGN1703 (TLR Agonist) in Patients With Advanced Solid Malignancies	MGN1703 given by intratumoral injection at MTD from the Dose Escalation Group. MGN1703, is a DNA-based, radically different molecular alternative to CpG-ODN, which results in genuine antitumor immunomodulation.	No Results Available	Advanced Cancers|Melanoma	Drug: MGN1703|Drug: Ipilimumab	Maximum Tolerated Dose (MTD) of MGN1703 with Ipilimumab|Tumor Response	M.D. Anderson Cancer Center|Mologen AG	All	18 Years and older В (Adult, Older Adult)	Phase 1	28	Other|Industry	Interventional	Allocation: Non-Randomized|Intervention Model: Parallel Assignment|Masking: None (Open Label)|Primary Purpose: Treatment	2015-0135|NCI-2016-00276	May 11, 2016	May 31, 2023	May 31, 2024	January 29, 2016		February 15, 2022	University of Texas MD Anderson Cancer Center, Houston, Texas, United States		https://ClinicalTrials.gov/show/NCT02668770
Adjuvant	7	Active, not recruiting	NCT03865082	Study of Tilsotolimod in Combination With Nivolumab and Ipilimumab for the Treatment of Solid Tumors (ILLUMINATE-206)	Tilsotolimod by intratumoral injection. Tilsotolimod is an investigational synthetic Toll-like receptor 9 (TLR9) agonist that has demonstrated antitumor activity in preclinical models.	No Results Available	Solid Tumor	Drug: Tilsotolimod|Drug: Nivolumab|Drug: Ipilimumab	Demonstrate the efficacy of intratumoral tilsotolimod in combination with ipilimumab and nivolumab for each cohort|Duration of response|Safety and tolerability of the combination of tilsotolimod with nivolumab and ipilimumab	Idera Pharmaceuticals, Inc.|Bristol-Myers Squibb	All	18 Years and older В (Adult, Older Adult)	Phase 2	30	Industry	Interventional	Allocation: N/A|Intervention Model: Single Group Assignment|Masking: None (Open Label)|Primary Purpose: Treatment	2125-MST-206	October 29, 2019	March 2022	April 2022	March 6, 2019		February 17, 2022	Banner University Medical Center Tucson Campus, Tucson, Arizona, United States|University of Southern California/ Hoag Hospital Presbyterian, Newport Beach, California, United States|MD Anderson Cancer Center, Houston, Texas, United States		https://ClinicalTrials.gov/show/NCT03865082
mAb	8	Active, not recruiting	NCT02812524	Ipilimumab for Head and Neck Cancer Patients	intratumoral injections of ipilimumab prior to surgical resection	No Results Available	Squamous Cell Carcinoma of the Head and Neck	Drug: Intratumoral Ipilimumab	Surgery delay|Feasibility of paired tissue sample acquisition|Acceptance of study	Providence Health & Services|Bristol-Myers Squibb	All	18 Years and older В (Adult, Older Adult)	Phase 1	18	Other|Industry	Interventional	Allocation: N/A|Intervention Model: Single Group Assignment|Masking: None (Open Label)|Primary Purpose: Treatment	16-042	November 18, 2016	September 21, 2019	November 2023	June 24, 2016		January 10, 2023	Portland Providence Medical Center, Portland, Oregon, United States		https://ClinicalTrials.gov/show/NCT02812524
Viral	9	Active, not recruiting	NCT04348916	Study of ONCR-177 Alone and in Combination With PD-1 Blockade in Adult Subjects With Advanced and/or Refractory Cutaneous, Subcutaneous or Metastatic Nodal Solid Tumors or With Liver Metastases of Solid Tumors	ONCR-177, an oncolytic Herpes Simplex Virus for intratumoral injection, alone and in combination with PD-1 blockade	No Results Available	Cancer|Melanoma|Solid Tumor|Squamous Cell Carcinoma of Head and Neck|Breast Cancer|Advanced Solid Tumor|Triple Negative Breast Cancer|Colorectal Carcinoma|Non-melanoma Skin Cancer|Liver Metastases	Biological: ONCR-177|Biological: pembrolizumab	Percentage of Dose-Limiting Toxicities (DLTs)|Percentage of Adverse Events (AEs)|Percentage of Serious Adverse Events (SAEs)|Maximum Tolerated Dose (MTD) of ONCR-177|Recommended Phase 2 Dose (RP2D) of ONCR-177|Percentage of Objective Response Rate (ORR)|Durable Response Rate (DRR)|Progression Free Survival (PFS)|Overall Survival (OS)|Incidence and rate of detection of ONCR-177|Changes in the leve…	Oncorus, Inc.|Merck Sharp & Dohme LLC	All	18 Years and older В (Adult, Older Adult)	Phase 1	132	Industry	Interventional	Allocation: Non-Randomized|Intervention Model: Parallel Assignment|Masking: None (Open Label)|Primary Purpose: Treatment	ONCR-177-101|KEYNOTE-B73	May 20, 2020	January 2025	July 2028	April 16, 2020		January 6, 2023	City of Hope, Duarte, California, United States|Sarah Cannon Research Institute at HealthONE, Denver, Colorado, United States|Moffitt Cancer Center, Tampa, Florida, United States|Emory University, Atlanta, Georgia, United States|Massachusetts General Hospital, Boston, Massachusetts, United States|Dana-Farber Cancer Institute, Boston, Massachusetts, United States|Roswell Park Cancer Institute, Buf…		https://ClinicalTrials.gov/show/NCT04348916
Adjuvant	10	Active, not recruiting	NCT04050085	SD-101, Nivolumab, and Radiation Therapy in Treating Patients With Chemotherapy-Refractory Metastatic Pancreatic Cancer	Patients receive TLR9 agonist SD-101 intratumorally. SD-101 is a synthetic oligonucleotide with cytidine-phospho-guanosine (CpG) motifs that stimulates plasmacytoid dendritic cells (pDC)	No Results Available	Metastatic Pancreatic Adenocarcinoma|Refractory Pancreatic Adenocarcinoma|Stage IV Pancreatic Cancer AJCC v8	Biological: Nivolumab|Radiation: Radiation Therapy|Drug: TLR9 Agonist SD-101	Incidence of adverse events|Disease control rate|Duration of response|Progression free survival|Overall survival	University of California, Davis|National Cancer Institute (NCI)|Bristol-Myers Squibb|Dynavax Technologies Corporation	All	18 Years and older В (Adult, Older Adult)	Phase 1	6	Other|NIH|Industry	Interventional	Allocation: N/A|Intervention Model: Single Group Assignment|Masking: None (Open Label)|Primary Purpose: Treatment	1452314|NCI-2019-04928|UCDCC#281|P30CA093373	August 15, 2019	December 3, 2021	March 2023	August 8, 2019		November 25, 2022	University of California Davis Comprehensive Cancer Center, Sacramento, California, United States		https://ClinicalTrials.gov/show/NCT04050085
	11	Active, not recruiting	NCT02274753	Personalizing Colorectal Cancer Medicine (ImmuCol2)	intratumoral density memory T lymphocytes (CD45RO) and cytotoxic (CD8) strongly influenced the clinical outcome of patients	No Results Available	Colon Cancer		Relapse in relation with the immunoscore determined on a tumor section and criteria defined in the monitoring of patients|Relapse in relation with the immune component cancers beyond immunoscore|Relapse in relation with the immunoscore on biopsies	Assistance Publique - HГґpitaux de Paris|Ministry of Health, France	All	18 Years and older В (Adult, Older Adult)		220	Other	Observational	Observational Model: Cohort|Time Perspective: Prospective	NI13017	March 11, 2015	December 31, 2021	December 31, 2021	October 24, 2014		October 12, 2021	Hopital de BesanГ§on (CHU), BesanГ§on, France|Hopital Avicenne, Bobigny, France|CHU de Bordeaux, Bordeaux, France|Institut BergoniГ© Bordeaux, Bordeaux, France|Hopital Beaujon, Clichy, France|Hopital de Dijon (CHU), Dijon, France|Hopital Europeen Georges Pompidou (HEGP), Paris, France|Hopital de Poitiers (CHU), Poitiers, France|Hopital Charles Nicolle (CHU), Rouen, France		https://ClinicalTrials.gov/show/NCT02274753
Adjuvant	12	Active, not recruiting	NCT03956680	An Investigational Immunotherapy Study of BMS-986301 Alone or in Combination With Nivolumab, and Ipilimumab in Participants With Advanced Solid Cancers	BMS-986301 Monotherapy Intratumoral (I-TUMOR) Sub-study. STING agonist BMS-986301: An agonist of stimulator of interferon genes (STING) protein, with potential immunoactivating and antineoplastic activities.	No Results Available	Advanced Solid Cancers	Drug: BMS-986301|Biological: Nivolumab|Biological: Ipilimumab	Incidence of dose-limiting toxicity (DLTs)|Incidence of adverse events (AEs)|Incidence of serious adverse events (SAEs)|Incidence of AEs leading to discontinuation|Incidence of deaths|Incidence of clinically significant changes in clinical laboratory results: Hematology tests|Incidence of clinically significant changes in clinical laboratory results: Clinical Chemistry tests|Incidence of clinical…	Bristol-Myers Squibb	All	18 Years and older В (Adult, Older Adult)	Phase 1	190	Industry	Interventional	Allocation: N/A|Intervention Model: Sequential Assignment|Masking: None (Open Label)|Primary Purpose: Treatment	CA046-006|2018-003610-41	March 26, 2019	August 20, 2025	November 28, 2025	May 21, 2019		December 1, 2022	Local Institution - 0003, Chicago, Illinois, United States|Local Institution - 0005, Saint Louis, Missouri, United States|Local Institution - 0006, Pittsburgh, Pennsylvania, United States|Local Institution - 0002, Nashville, Tennessee, United States|Local Institution - 0001, Toronto, Ontario, Canada		https://ClinicalTrials.gov/show/NCT03956680
Adjuvant	13	Active, not recruiting	NCT04420975	Nivolumab and BO-112 Before Surgery for the Treatment of Resectable Soft Tissue Sarcoma	Patients receive BO-112 intratumorally. BO-112 is a dsRNA (poly I:C) formulated with the cationic carrier polyethylenimine, which improves its intracellular delivery. Preclinically it acts by activating TLR3, RIG-1 and MDA-5, leading to an immunogenic cell death and increasing immune-checkpoint inhibition effects.	No Results Available	Leiomyosarcoma|Malignant Peripheral Nerve Sheath Tumor|Myxofibrosarcoma|Pleomorphic Rhabdomyosarcoma|Resectable Dedifferentiated Liposarcoma|Resectable Soft Tissue Sarcoma|Resectable Undifferentiated Pleomorphic Sarcoma|Soft Tissue Fibrosarcoma|Spindle Cell Sarcoma|Stage I Retroperitoneal Sarcoma AJCC (American Joint Committee on Cancer) v8|Stage I Soft Tissue Sarcoma of the Trunk and Extremities…	Procedure: Definitive Surgical Resection|Biological: Nanoplexed Poly I:C BO-112|Biological: Nivolumab|Radiation: Radiation Therapy	Incidence of adverse events (AEs)|Immune-oncologic impact of the BO-112 or the combined regimen of nivolumab and BO-112|Pathologic treatment effect	Jonsson Comprehensive Cancer Center|National Cancer Institute (NCI)|Highlight Therapeutics	All	18 Years and older В (Adult, Older Adult)	Phase 1	14	Other|NIH|Industry	Interventional	Allocation: N/A|Intervention Model: Single Group Assignment|Masking: None (Open Label)|Primary Purpose: Treatment	19-000419|NCI-2019-08556|1K08CA245181-01	October 29, 2020	January 31, 2024	January 31, 2025	June 9, 2020		November 21, 2022	UCLA / Jonsson Comprehensive Cancer Center, Los Angeles, California, United States		https://ClinicalTrials.gov/show/NCT04420975
Viral	14	Active, not recruiting	NCT03252808	Phase I Study of TBI-1401(HF10) Plus Chemotherapy in Patients With Unresectable Pancreatic Cancer.	Patients receive the repeated intratumoral injection of TBI-1401(HF10) at recommended dose at 2-week intervals in combination with intravenous infusion of Gemcitabine and Nab-paclitaxel	No Results Available	Pancreatic Cancer Stage III|Pancreatic Cancer Stage IV	Biological: TBI-1401(HF10)|Drug: Gemcitabine|Drug: Nab-paclitaxel|Drug: TS-1	Dose Limiting Toxicity (DLT)|Adverse Events (AEs)|Objective response rate (ORR) by RECIST|Objective response rate (ORR) by irRECIST|Progression-free survival (PFS) by RECIST|Progression-free survival (PFS) by irRECIST	Takara Bio Inc.	All	20 Years and older В (Adult, Older Adult)	Phase 1	36	Industry	Interventional	Allocation: Randomized|Intervention Model: Parallel Assignment|Masking: None (Open Label)|Primary Purpose: Treatment	TBI1401-03	September 25, 2017	February 19, 2020	March 31, 2035	August 17, 2017		June 21, 2022	Clinical Site, Nagoya, Aichi, Japan|Clinical Site, Kashiwa, Chiba, Japan|Clinical Site, Yokohama, Kanagawa, Japan|Clinical Site, ChЕ«ЕЌku, Tokyo, Japan|Clinical Site, Koto-Ku, Tokyo, Japan|Clinical Site, Chiba, Japan|Clinical Site, Nagoya, Japan|Clinical Site, Osaka, Japan		https://ClinicalTrials.gov/show/NCT03252808
Chemotherapy+	15	Active, not recruiting	NCT03058289	A Phase 1/2 Safety Study of Intratumorally Dosed INT230-6	intratumoral administration of escalating doses of a novel, experimental drug, INT230-6. INT230-6 is comprised of a 3 agents in a fixed ratio - a cell permeation enhancer and two, potent anti-cancer payloads (cisplatin and vinblastine sulfate). The penetration enhancer facilitates dispersion of the two drugs throughout injected tumors and enables increased diffusion into cancer cells. (Nonclinica…	No Results Available	Breast Cancer|Head and Neck Cancer|Squamous Cell Carcinoma|Lymphoma|Pancreatic Cancer|Liver Cancer|Colon Cancer|Lung Cancer|Bile Duct Cancer|Chordoma of Sacrum|Sarcoma	Drug: INT230-6|Biological: anti-PD-1 antibody|Biological: anti-CTLA-4 antibody	Rate and severity of treatment-emergent adverse events в‰Ґ grade 3 attributed to study drug using the NCI Common Terminology Criteria for Adverse Events (CTCAE v.4.03) (Scale 1 to 5)|Preliminary Efficacy: Control or Regression of Injected Tumors by Measurement of Length, Width and Height (in centimeters) Radio-graphically Using Computer Tomography or Magnetic Resonance Imaging to Calculate Tumor …	Intensity Therapeutics, Inc.|Merck Sharp & Dohme LLC|Bristol-Myers Squibb	All	18 Years and older В (Adult, Older Adult)	Phase 1|Phase 2	110	Industry	Interventional	Allocation: Non-Randomized|Intervention Model: Sequential Assignment|Masking: None (Open Label)|Primary Purpose: Treatment	IT-01|KEYNOTE KN-A10|CA184-592	February 9, 2017	July 2022	October 2023	February 20, 2017		June 27, 2022	USC Norris, Los Angeles, California, United States|USC HOAG, Newport Beach, California, United States|Sidney Kimmel Comprehensive Cancer Center at Johns Hopkins, Baltimore, Maryland, United States|UMASS Memorial Medical Center, Worcester, Massachusetts, United States|Columbia University Medical Center, New York, New York, United States|Fox Chase Cancer Center, Philadelphia, Pennsylvania, United S…		https://ClinicalTrials.gov/show/NCT03058289
	16	Active, not recruiting	NCT02957968	Neoadjuvant Pembrolizumab + Decitabine Followed by Std Neoadj Chemo for Locally Advanced HER2- Breast Ca	(LPBC is defined as breast cancer with ≥ 60% intratumoral or stromal area with infiltrating lymphocytes.)	No Results Available	Breast Adenocarcinoma|Estrogen Receptor- Negative Breast Cancer|Estrogen Receptor-positive Breast Cancer|HER2/Neu Negative|Invasive Breast Carcinoma|Progesterone Receptor Negative|Progesterone Receptor Positive Tumor|Stage II Breast Cancer|Stage IIA Breast Cancer|Stage IIB Breast Cancer|Stage IIIA Breast Cancer|Stage IIIB Breast Cancer|Triple-negative Breast Carcinoma	Drug: Doxorubicin|Drug: Cyclophosphamide|Drug: Paclitaxel|Drug: Carboplatin|Drug: Decitabine|Drug: Pembrolizumab	Number of patientw with an increase in percent of tumor and stroma with infiltrating lymphocytes from baseline pre-treatment biopsy to post-immunotherapy biopsy following administration of decitabine followed by pembrolizumab.|Number of adverse events (AEs) reported during and after immune treatment (ie, decitabine and pembrolizumab)|Number of patients meeting criteria for lymphocyte-predominant …	Virginia Commonwealth University|Merck Sharp & Dohme LLC|National Cancer Institute (NCI)	All	18 Years and older В (Adult, Older Adult)	Phase 2	47	Other|Industry|NIH	Interventional	Allocation: Non-Randomized|Intervention Model: Parallel Assignment|Masking: None (Open Label)|Primary Purpose: Treatment	MCC-15-11083|NCI-2016-01980|P30CA016059	January 24, 2017	February 28, 2025	February 28, 2025	November 8, 2016		January 25, 2023	St. Elizabeth Healthcare, Edgewood, Kentucky, United States|Ohio State University Comprehensive Cancer Center, Columbus, Ohio, United States|University of Virginia, Charlottesville, Virginia, United States|Virginia Commonwealth University/Massey Cancer Center, Richmond, Virginia, United States|VCU Community Memorial Healthcenter, Richmond, Virginia, United States	Informed Consent Form, https://ClinicalTrials.gov/ProvidedDocs/68/NCT02957968/ICF_000.pdf	https://ClinicalTrials.gov/show/NCT02957968
	17	Active, not recruiting	NCT02451423	Neoadjuvant Atezolizumab in Localized Bladder Cancer	assess the intratumoral immune response associated with increasing numbers of atezolizumab (MPDL3280A) treatments	No Results Available	Carcinoma, Transitional Cell	Drug: Atezolizumab	Change in CD3+ T cell count/Вµm2 in the multi-dose cohorts|Mean Change in CD3+ Ki67+ proliferative T cell count/Вµm2 in the multi-dose cohorts|Change in CD4+ FoxP3- helper T cell count/Вµm2 in the multi-dose cohorts|Change in CD4+ FoxP3+ regulatory T cell count/Вµm2 in the multi-dose cohorts|Change in CD8+ cytotoxic T cell count/Вµm2 in the multi-dose cohorts|Percentage of subjects with a treatme…	Lawrence Fong|Genentech, Inc.|The Bladder Cancer Advocacy Network|Conquer Cancer Foundation|National Cancer Institute (NCI)|University of California, San Francisco	All	18 Years and older В (Adult, Older Adult)	Phase 2	23	Other|Industry|NIH	Interventional	Allocation: Non-Randomized|Intervention Model: Sequential Assignment|Masking: None (Open Label)|Primary Purpose: Treatment	14524|NCI-2017-01387|R01CA194511	March 29, 2016	March 31, 2023	March 31, 2023	May 22, 2015		May 31, 2022	University of California, San Francisco, San Francisco, California, United States	Informed Consent Form, https://ClinicalTrials.gov/ProvidedDocs/23/NCT02451423/ICF_000.pdf	https://ClinicalTrials.gov/show/NCT02451423
Viral	18	Active, not recruiting	NCT03294083	A Study of Recombinant Vaccinia Virus in Combination With Cemiplimab for Renal Cell Carcinoma	Pexa-Vec, which will be administered either through intravenous (IV) or intratumoral (IT) injection	No Results Available	Renal Cell Carcinoma	Biological: Pexastimogene Devacirepvec (Pexa-Vec)|Biological: Cemiplimab	Maximum tolerated dose(MTD) / Maximum feasible dose (MFD)|Severity and frequency of adverse events to determine safety of Pexa-Vec administered by IV infusions or IT injections in combination with IV Cemiplimab|Overall response rate|Progression free survival|Disease control rate|Best radiographic response|Overall survival	SillaJen, Inc.|Regeneron Pharmaceuticals	All	18 Years and older В (Adult, Older Adult)	Phase 1|Phase 2	89	Industry	Interventional	Allocation: Randomized|Intervention Model: Parallel Assignment|Masking: None (Open Label)|Primary Purpose: Treatment	JX594-REN026	June 7, 2018	August 2023	November 2023	September 26, 2017		October 27, 2022	Site 2644 University of California, Irvine, Irvine, California, United States|Site 2641 University of Miami, Miami, Florida, United States|Site 2643 Washington University, Saint Louis, Missouri, United States|Site 2646 The Ohio State University, Columbus, Ohio, United States|Site 2632 Flinders Medical Centre, Bedford Park, Australia|Site 2612 Kyungpook National University Chilgok Hospital, Daegu,…		https://ClinicalTrials.gov/show/NCT03294083
Virus-like/Adjuvant	19	Active, not recruiting	NCT04633278	CMP-001 in Combination With Pembrolizumab in Subjects With Recurrent or Metastatic Head and Neck Squamous Cell Carcinoma	Phase 2 study of CMP-001 intratumoral (IT) and pembrolizumab intravenous (IV)	No Results Available	Squamous Cell Carcinoma of Head and Neck	Drug: CMP-001|Drug: Pembrolizumab	The objective response (investigator-assessed) to CMP-001 in combination with pembrolizumab in subjects with head and neck squamous cell carcinoma (HNSCC).|Safety and tolerability of CMP-001 administered by intratumoral (IT) injection in combination with pembrolizumab in subjects with HNSCC.|Efficacy [characterized by DOR, PFS, and OS, along with Immune Objective Response Rate (iORR), Immune Dura…	Regeneron Pharmaceuticals	All	18 Years and older В (Adult, Older Adult)	Phase 2	24	Industry	Interventional	Allocation: N/A|Intervention Model: Single Group Assignment|Masking: None (Open Label)|Primary Purpose: Treatment	CMP-001-007	November 30, 2020	July 30, 2024	July 30, 2024	November 18, 2020		November 16, 2022	University of Arkansas for Medical Sciences, Little Rock, Arkansas, United States|University of California - San Diego, La Jolla, California, United States|University of Southern California - Norris Comprehensive Cancer Center, Los Angeles, California, United States|UCLA Hematology-Oncology, Los Angeles, California, United States|University of Southern California: Norris Oncology/Hematology - New…		https://ClinicalTrials.gov/show/NCT04633278
	20	Active, not recruiting	NCT03854032	Nivolumab and BMS986205 in Treating Patients With Stage II-IV Squamous Cell Cancer of the Head and Neck	Change in prevalence of intratumoral immune cell populations	No Results Available	Lip|Oral Cavity Squamous Cell Carcinoma|Pharynx|Larynx|Squamous Cell Carcinoma	Biological: Nivolumab|Biological: IDO1 Inhibitor BMS-986205|Procedure: Therapeutic Conventional Surgery|Other: Questionnaire Administration	Objective Response|Objective pathologic response at time of surgery|Change in immune cell polarization (Th1/Th2; M1/M2) in peripheral blood and tumor specimens|Change in inflammatory markers|Change in prevalence of intratumoral immune cell populations (effector T cells [Teff], regulatory T cells [Treg], and tumor-associated macrophages [TAM] in patients treated with Nivolumab and BMS986205 as com…	Thomas Jefferson University|Bristol-Myers Squibb	All	18 Years and older В (Adult, Older Adult)	Phase 2	45	Other|Industry	Interventional	Allocation: Randomized|Intervention Model: Parallel Assignment|Masking: None (Open Label)|Primary Purpose: Treatment	18P.771	April 9, 2019	December 2025	December 2025	February 26, 2019		November 17, 2022	Ohio State University, Columbus, Ohio, United States|Sidney Kimmel Cancer Center at Thomas Jefferson University, Philadelphia, Pennsylvania, United States		https://ClinicalTrials.gov/show/NCT03854032
	21	Active, not recruiting	NCT03426657	Radiotherapy With Double Checkpoint Blockade of Locally Advanced HNSCC	Intratumoral CD8+ T Cell Infiltration	No Results Available	Locally Advanced Head and Neck Squamous Cell Carcinoma	Combination Product: Durvalumab + Tremelimumab + RT	Assessment of the number of participants receiving the protocol treatment until cycle 6 of antibody treatment|Assessment of the predictive character of changes of CD8+ tumor infiltrating immune cells after induction chemo-immunotherapy|Assessment of the absence of any dose-limiting toxicities|Progression free survival|Pathologically confirmed response|Overall survival	University of Erlangen-NГјrnberg Medical School	All	18 Years to 100 Years В (Adult, Older Adult)	Phase 2	120	Other	Interventional	Allocation: N/A|Intervention Model: Single Group Assignment|Masking: None (Open Label)|Primary Purpose: Treatment	CheckRad-CD8	September 20, 2018	September 16, 2021	April 2023	February 8, 2018		June 16, 2022	Klinik Chemnitz gGmbH, Chemnitz, Germany|Dresden, Onkologische Gemeinschaftspraxis, Dresden, Germany|DГјsseldorf, UniversitГ¤tsklinikum, Klinik fГјr Strahlentherapie und Radiologische Onkologie, DГјsseldorf, Germany|Erlangen, UniversitГ¤tsklinikum Strahlenklinik, Erlangen, Germany|Frankfurt, UniversitГ¤tsklinikum, Klinik fГјr Strahlentherapie und Onkologie, Frankfurt, Germany|UniversitГ¤tskliniku…		https://ClinicalTrials.gov/show/NCT03426657
cell	22	Active, not recruiting	NCT02208362	Genetically Modified T-cells in Treating Patients With Recurrent or Refractory Malignant Glioma	Patients receive IL13R alpha 2-specific, hinge-optimized, 41BB-costimulatory CAR/truncated CD19-expressing T lymphocytes via intratumoral catheter over 5 minutes weekly for 3 weeks	No Results Available	Recurrent Glioblastoma|Recurrent Malignant Glioma|Recurrent WHO Grade II Glioma|Recurrent WHO Grade III Glioma|Refractory Glioblastoma|Refractory Malignant Glioma|Refractory WHO Grade II Glioma|Refractory WHO Grade III Glioma	Biological: IL13Ralpha2-specific Hinge-optimized 4-1BB-co-stimulatory CAR/Truncated CD19-expressing Autologous TN/MEM Cells|Biological: IL13Ralpha2-specific Hinge-optimized 41BB-co-stimulatory CAR Truncated CD19-expressing Autologous T-Lymphocytes|Other: Laboratory Biomarker Analysis|Procedure: Magnetic Resonance Imaging|Procedure: Magnetic Resonance Spectroscopic Imaging|Other: Quality-of-Life A…	Incidence of grade 3 toxicity|Incidence of dose limiting toxicity (DLT), graded using National Cancer Institute (NCI) Common Toxicity Criteria for Adverse Events (CTCAE) version 4.0|Incidence of toxicities, graded using National Cancer Institute (NCI) Common Toxicity Criteria for Adverse Events (CTCAE) version 4.0 as well as the modified neurological grading system|Changes in largest length of tu…	City of Hope Medical Center|National Cancer Institute (NCI)|Food and Drug Administration (FDA)	All	12 Years to 75 Years В (Child, Adult, Older Adult)	Phase 1	82	Other|NIH|U.S. Fed	Interventional	Allocation: Non-Randomized|Intervention Model: Parallel Assignment|Masking: None (Open Label)|Primary Purpose: Treatment	13384|NCI-2014-01488|P30CA033572|R01FD005129	May 18, 2015	June 18, 2023	June 18, 2023	August 5, 2014		January 5, 2023	City of Hope Comprehensive Cancer Center, Duarte, California, United States		https://ClinicalTrials.gov/show/NCT02208362
Adjuvant	23	Active, not recruiting	NCT04570332	BO-112 With Pembrolizumab in Unresectable Malignant Melanoma	IT administration of BO-112 will be performed once weekly (QW) for the first 7 weeks and then once every three weeks (Q3W)	No Results Available	Melanoma	Drug: BO-112 and Pembrolizumab|Procedure: Tissue Biopsies	Anti-tumor activity of study treatment|Incidence of Adverse events and Serious Adverse Events|Disease Control Rate|Duration of Response|Progression Free Survival	Highlight Therapeutics|Merck Sharp & Dohme LLC	All	18 Years and older В (Adult, Older Adult)	Phase 2	42	Industry	Interventional	Allocation: N/A|Intervention Model: Single Group Assignment|Masking: None (Open Label)|Primary Purpose: Treatment	BOT112-03|2020-003921-51|KEYNOTE-B77	December 30, 2020	August 30, 2023	December 20, 2023	September 30, 2020		December 12, 2022	Centre Hospitalier Universitaire de Bordeaux, Bordeaux, France|Centre Hospitalier Universitaire de Grenoble, Grenoble, France|Hopital Lyon Sud, Lyon, France|Centre Hospitalier Universitaire de Nantes, Nantes, France|Centre Hospitalier Universitaire de Nice, Nice, France|HГґpital Ambroise-ParГ©, Paris, France|Institut Gustave Roussy, Paris, France|H. Universitari Germans Trias i Pujol, Badalona, B…		https://ClinicalTrials.gov/show/NCT04570332
	24	Active, not recruiting	NCT03817736	Sequential TACE and SBRT Followed by ImmunoTherapy for Downstaging HCC for Hepatectomy	Disappearance of any intra-tumoral arterial enhancement in all target lesions	No Results Available	HCC	Procedure: TACE|Radiation: SBRT|Drug: Immune Checkpoint Inhibitor	Number of Patients Amendable to Curative Surgical Interventions|Response rate measured by mRECIST criteria|Time to progression (TTP)|Progression-free survival (PFS)|Overall survival (OS)|European Organization for Research and Treatment of Cancer Core Quality of Life Questionnaire (EORTC-QLQ-C30) Score|Functional Assessment of Cancer Therapy-Hepatobiliary (FACT-Hep) Score|Incidence of Study-Relate…	The University of Hong Kong|Merck KGaA, Darmstadt, Germany	All	18 Years to 75 Years В (Adult, Older Adult)	Phase 2	33	Other|Industry	Interventional	Allocation: N/A|Intervention Model: Single Group Assignment|Masking: None (Open Label)|Primary Purpose: Treatment	UW 18-541	March 1, 2019	June 14, 2022	January 31, 2023	January 25, 2019		October 25, 2022	Department of Clinical Oncology, Hong Kong, Hong Kong	Study Protocol, https://ClinicalTrials.gov/ProvidedDocs/36/NCT03817736/Prot_002.pdf	https://ClinicalTrials.gov/show/NCT03817736
Virus-like/Adjuvant	25	Active, not recruiting	NCT04698187	CMP-001 in Combination With Nivolumab in Subjects With Advanced Melanoma	CMP-001 intratumoral (IT) and nivolumab intravenous (IV)	No Results Available	Melanoma|Advanced Melanoma|Metastatic Melanoma|Unresectable Melanoma	Drug: CMP-001|Drug: Nivolumab	Determine confirmed objective response (ORR) with CMP-001 in combination with nivolumab in subjects with refractory unresectable or metastatic melanoma|Evaluate the safety and tolerability of CMP-001 administered by IT injection in combination with nivolumab|Duration of response (DOR)|Treatment response in non-injected target lesions|Progression-free survival (PFS)|Overall survival (OS)|Immune ob…	Regeneron Pharmaceuticals|Bristol-Myers Squibb	All	18 Years and older В (Adult, Older Adult)	Phase 2	44	Industry	Interventional	Allocation: N/A|Intervention Model: Single Group Assignment|Masking: None (Open Label)|Primary Purpose: Treatment	CMP-001-010	February 10, 2021	October 6, 2024	October 6, 2024	January 6, 2021		January 12, 2023	Mayo Clinic, Phoenix, Arizona, United States|City of Hope National Medical Center, Robert Kang, MD, Duarte, California, United States|UCLA Hematology-Oncology, Los Angeles, California, United States|California Cancer Associates for Research & Excellence, Inc., San Marcos, California, United States|University of Colorado- Denver, Denver, Colorado, United States|Hartford Healthcare, Hartford, Conne…		https://ClinicalTrials.gov/show/NCT04698187
Virus-like/Adjuvant	26	Active, not recruiting	NCT04695977	CMP-001 in Combination With Nivolumab Compared to Nivolumab Monotherapy in Subjects With Advanced Melanoma	CMP-001 intratumoral (IT) and nivolumab intravenous (IV)	No Results Available	Melanoma|Advanced Melanoma|Metastatic Melanoma|Unresectable Melanoma	Drug: CMP-001|Drug: Nivolumab	Phase 2: Determine confirmed objective response with CMP-001 in combination with nivolumab versus nivolumab monotherapy in subjects with unresectable or metastatic melanoma|Phase 3: Evaluate progression-free survival for subjects receiving CMP-001 in combination with nivolumab versus nivolumab monotherapy for unresectable or metastatic melanoma|Phase 2 & 3: Evaluate the safety & tolerability of C…	Regeneron Pharmaceuticals|Bristol-Myers Squibb	All	18 Years and older В (Adult, Older Adult)	Phase 2|Phase 3	20	Industry	Interventional	Allocation: Randomized|Intervention Model: Parallel Assignment|Masking: None (Open Label)|Primary Purpose: Treatment	CMP-001-011	February 5, 2021	September 6, 2024	September 6, 2024	January 6, 2021		January 12, 2023	Mayo Clinic Arizona, Phoenix, Arizona, United States|University of Arkansas for Medical Sciences, Little Rock, Arkansas, United States|Moores Cancer Center at UC San Diego Health, La Jolla, California, United States|USC/Norris Comprehensive Cancer Center, Los Angeles, California, United States|University of California, Los Angeles, Los Angeles, California, United States|USC Norris Oncology/Hemato…		https://ClinicalTrials.gov/show/NCT04695977
cell	1	Recruiting	NCT01818323	Phase I Trial: T4 Immunotherapy of Head and Neck Cancer	Intra-tumoral administration of a single dose of T4-positive patient-derived T-cells	No Results Available	Head and Neck Cancer	Other: Intra-tumoral T4 immunotherapy	Dose limiting toxicities for T4 immunotherapy in SCCHN and determine a safe and feasible recommended dose for phase II testing of intra-tumoral T4 immunotherapy.|To investigate serum cytokine levels after administration of T4 immunotherapy|To investigate persistence of T4+ T-cells at the site of administration and in the peripheral circulation|To achieve preliminary assessment of anti-tumour acti…	King's College London|Guy's and St Thomas' NHS Foundation Trust	All	18 Years and older В (Adult, Older Adult)	Phase 1	30	Other	Interventional	Allocation: N/A|Intervention Model: Single Group Assignment|Masking: None (Open Label)|Primary Purpose: Treatment	2012-001654-25	June 2015	December 2023	December 2023	March 26, 2013		April 6, 2022	Clinical Research Facility, Guy's Hospital, London, United Kingdom		https://ClinicalTrials.gov/show/NCT01818323
Adjuvant	2	Recruiting	NCT04612530	PANFIRE-3 Trial: Assessing Safety and Efficacy of Irreversible Electroporation (IRE) + Nivolumab + CpG for Metastatic Pancreatic Cancer	after pre-treatment with FOLFIRINOX (4-8 cycles), a toll-like receptor ligand (CpG) will be administered into the primary pancreatic tumor. A week later, the patient will receive (an incomplete) IRE of the primary tumor.	No Results Available	Pancreatic Cancer|Metastatic Pancreatic Cancer	Device: Irreversible Electroporation (IRE)|Drug: Nivolumab|Drug: Toll-Like Receptor 9	Safety of the combination treatment IRE + immunotherapy based on adverse events|Overall Survival|Progression-Free Survival|Immunomodulation (local)|Immunomodulation (systemic)|Tumor Response on Imaging|Quality of Life throughout treatment based on overall health|Quality of Life throughout treatment based on specific health questions|Quality of Life throughout treatment based on Chemotherapy-Induc…	Amsterdam UMC, location VUmc	All	18 Years to 100 Years В (Adult, Older Adult)	Phase 1	18	Other	Interventional	Allocation: Randomized|Intervention Model: Parallel Assignment|Masking: None (Open Label)|Primary Purpose: Treatment	2020.231 - NL73415.029.20	September 1, 2020	April 1, 2023	June 1, 2023	November 3, 2020		December 20, 2022	Amsterdam University Medical Centre (location VUmc), Amsterdam, North-Holland, Netherlands		https://ClinicalTrials.gov/show/NCT04612530
	3	Recruiting	NCT04977791	Analysis of Drug Resistance in Immune Checkpoint Inhibitors of Non-small Cell Lung Cancer	intra tumoral heterogeneity (ITH)	No Results Available	Non-Small Cell Lung Cancer	Drug: Anti-PD-1/PD-L1 monoclonal antibody	Objective response rate (ORR)|Progression-free survival (PFS)|Overall survival (OS)	Shanghai Chest Hospital	All	18 Years and older В (Adult, Older Adult)		250	Other	Observational	Observational Model: Case-Only|Time Perspective: Prospective	THORACIC001	July 21, 2016	December 1, 2026	December 31, 2028	July 27, 2021		January 20, 2023	Xiaomin Niu, Shanghai, Shanghai, China		https://ClinicalTrials.gov/show/NCT04977791
	4	Recruiting	NCT04676009	Feasibility of an Acute Physical Exercise Before Treatment Infusion for Metastatic Lung Cancer Patients	exercise performed during chemotherapy administration could result in physiological benefits such as improved intra-tumoral infusion and drug delivery. The ERICA study aims to assess the feasibility of an acute physical exercise immediately before immunotherapy and chemotherapy administration in patients with mNSCLC.	No Results Available	Carcinoma, Non-Small-Cell Lung	Other: Exercise arm :	Investigate the feasibility of an acute physical exercise during the immunotherapy/chemotherapy preinfusion|Investigate the physical activity fitness (sub-maximum endurance test)|Investigate the lower strength muscular function change|Investigate the maximum isometric upper limb strength change|Investigate the Physical Activity level change|Investigate the patient anthropometrics change|Investiga…	Centre Leon Berard|Claude Bernard University|Lyon Cancer Research Centre|Hospices Civils de Lyon|Inter-university Laboratory of Human Movement Biology	All	18 Years to 80 Years В (Adult, Older Adult)	Not Applicable	30	Other	Interventional	Allocation: Randomized|Intervention Model: Parallel Assignment|Masking: None (Open Label)|Primary Purpose: Supportive Care	ERICA|ET20000185	January 21, 2021	September 10, 2022	December 10, 2022	December 19, 2020		December 16, 2021	Centre LГ©on BГ©rard, Lyon, France		https://ClinicalTrials.gov/show/NCT04676009
mRNA	5	Recruiting	NCT03788083	Intratumoral TriMix Injections in Early Breast Cancer Patients	Intratumoral TriMix injection. TriMix: mRNA encoding CD70, CD40 ligand, and constitutively active TLR4	No Results Available	Breast Cancer Female|Early-stage Breast Cancer	Drug: Trimix|Drug: Placebo	Number of participants with treatment-related adverse events as assessed by CTCAE v5.0|Tumor microenvironment changes induced by intratumoral TriMix mRNA|TriMix mRNA induced T-cell responses	Universitair Ziekenhuis Brussel|eTheRNA immunotherapies	Female	18 Years to 85 Years В (Adult, Older Adult)	Phase 1	36	Other|Industry	Interventional	Allocation: Non-Randomized|Intervention Model: Sequential Assignment|Masking: Single (Participant)|Primary Purpose: Treatment	TriMix-Breast	November 12, 2018	September 30, 2024	December 30, 2024	December 27, 2018		May 19, 2022	UZ Brussel, Jette, Brussel, Belgium		https://ClinicalTrials.gov/show/NCT03788083
Adjuvant+	6	Recruiting	NCT03993678	Intratumoral Injection of IP-001 Following Thermal Ablation in Patients With Advanced Solid Tumors.	Patients with laser ablation-accessible solid tumors are treated by thermal ablation followed immediately by an intratumoral injection of IP-001 (1 % N-dihydro-galacto-chitosan) for injection). IP-001 is intended to trigger a tumor-specific systemic immune response when exposed to tumor antigens liberated by thermal ablation.	No Results Available	Advanced Solid Tumors	Drug: IP-001|Device: Thermal Ablation	Part 1 and Part 2, cohort 1 (expansion cohort - STS): Dose-limiting toxicity (DLT)|Part 2, Cohort 2 (phase IIa - melanoma): Disease control (DC) according to RECIST 1.1|Objective response according to iRECIST (iOR)|Disease control according to iRECIST (iDC)|Duration of response according to iRECIST (iDoR)|Progression-free survival according to iRECIST (iPFS)|Objective response (OR) according to R…	Swiss Group for Clinical Cancer Research|Immunophotonics, Inc.	All	18 Years and older В (Adult, Older Adult)	Phase 1|Phase 2	39	Other|Industry	Interventional	Allocation: N/A|Intervention Model: Single Group Assignment|Masking: None (Open Label)|Primary Purpose: Treatment	SAKK 66/17	October 12, 2020	June 30, 2023	December 31, 2023	June 21, 2019		November 8, 2022	Inselspital, Bern, Bern, Switzerland|Kantonsspital GraubГјnden, Chur, Switzerland|Centre hospitalier universitaire vaudois CHUV, Lausanne, Switzerland|Kantonsspital St. Gallen, St. Gallen, Switzerland		https://ClinicalTrials.gov/show/NCT03993678
Viral	7	Recruiting	NCT05136937	A Clinical Study of Intratumoral Administration of RT-01 in Patients With Advanced Solid Tumors	study of the safety and tolerability of oncolytic virus injection(RT-01) when administered via intratumoral injection in patients with advanced solid tumors	No Results Available	Solid Tumor|Advanced Cancer	Biological: Oncolytic Virus Injection(RT-01)	Dose Limiting Toxicities (DLT)|Safety and tolerability assessed by Adverse Events (AEs)|Number of participants with laboratory value abnormalities and/or adverse events|Number of participants with vital sign abnormalities and /or adverse event|Safety assessed by 12- lead electrocardiograms (ECGs) adverse events|To evaluate the efficacy assessed per RECIST and iRECIST|Number of Participants With R…	Wuxi People's Hospital	All	18 Years and older В (Adult, Older Adult)	Phase 1	18	Other	Interventional	Allocation: N/A|Intervention Model: Sequential Assignment|Masking: None (Open Label)|Primary Purpose: Treatment	LWY21076C1	November 1, 2021	June 1, 2022	June 1, 2023	November 30, 2021		January 31, 2022	Wuxi People's Hospital, Wuxi, Jiangsu, China		https://ClinicalTrials.gov/show/NCT05136937
Cell	8	Recruiting	NCT02451982	Platform Study of Neoadjuvant and Adjuvant Immunotherapy for Patients With Resectable Adenocarcinoma of the Pancreas	Intratumoral CD8+CD137+cells, Intratumoral granzyme B+PD-1+CD137+ cells	No Results Available	Pancreatic Cancer	Drug: Cyclophosphamide|Biological: GVAX pancreatic cancer|Drug: Nivolumab|Drug: Urelumab|Drug: BMS-986253	IL17A expression|Intratumoral CD8+CD137+cells|Intratumoral granzyme B+PD-1+CD137+ cells|Pathologic Response|Drug-Related Adverse Events|Overall Survival|Disease Free Survival	Sidney Kimmel Comprehensive Cancer Center at Johns Hopkins|National Cancer Institute (NCI)|Bristol-Myers Squibb	All	18 Years and older В (Adult, Older Adult)	Phase 2	76	Other|NIH|Industry	Interventional	Allocation: Randomized|Intervention Model: Parallel Assignment|Masking: None (Open Label)|Primary Purpose: Treatment	J1568|IRB00050517|R01CA197296	March 28, 2016	June 30, 2023	June 30, 2024	May 22, 2015		May 3, 2022	Sidney Kimmel Comprehensive Cancer Center at Johns Hopkins, Baltimore, Maryland, United States		https://ClinicalTrials.gov/show/NCT02451982
Viral	9	Recruiting	NCT05155332	A Study to Test Different Doses of BI 1831169 Alone and in Combination With Ezabenlimab in People With Different Types of Advanced Cancer (Solid Tumors)	Participants get BI 1831169 as an injection into the tumour, or as an infusion into the vein, or both (injection and infusion). Vesicular stomatitis virus (VSV)-glycoprotein (GP; BI 1831169) is a chimeric VSV with its neurotropic glycoprotein G replaced by the non-neurotropic GP of the lymphocytic choriomeningitis virus. DOI: 10.2217/fon-2022-0439	No Results Available	Solid Tumors	Drug: BI 1831169|Drug: ezabenlimab	Part 1 (Monotherapy), Dose escalation: Number of patients experiencing Dose limiting toxicities (DLTs) during the Maximum tolerated dose (MTD) evaluation period.|Part 1 (Monotherapy), Dose expansion: Objective response (OR) defined as best overall response (BOR) of confirmed intratumoral immunotherapy complete response (itCR) or confirmed partial response (itPR)|Part 2 (Combination Therapy), Dose…	Boehringer Ingelheim	All	18 Years and older В (Adult, Older Adult)	Phase 1	117	Industry	Interventional	Allocation: Non-Randomized|Intervention Model: Sequential Assignment|Masking: None (Open Label)|Primary Purpose: Treatment	1456-0001|2020-003902-30	March 11, 2022	November 15, 2024	June 30, 2025	December 13, 2021		February 8, 2023	Providence St. John's Health Center, Santa Monica, California, United States|University of Iowa Hospitals and Clinics, Iowa City, Iowa, United States|Morristown Medical Center, Morristown, New Jersey, United States|Wake Forest University Health Sciences, Winston-Salem, North Carolina, United States|INS Bergonie, Bordeaux, France|CTR EugГЁne Marquis, Rennes, France|INS Gustave Roussy, Villejuif, F…		https://ClinicalTrials.gov/show/NCT05155332
Viral	10	Recruiting	NCT05205408	A Study of Intratumoral Administration of Oncolytic Virus Injection (RT-01) in Patients With Advanced Solid Tumors	Oncolytic virus injection(RT-01) When Administered Via Intratumoral Injection in patients with advanced solid tumors.	No Results Available	Advanced Solid Tumor	Biological: Oncolytic Virus Injection(RT-01)	Dose Limiting Toxicities (DLT)|Incidence of adverse events|To evaluate the antitumor activity.|The changes of the immunoreactivity during treatment|To evaluate the immunogenicity of RT-01|To evaluate the viral shedding of RT-01|The Pharmacokinetics characteristics of RT-01	First Affiliated Hospital Bengbu Medical College	All	18 Years and older В (Adult, Older Adult)	Phase 1	7	Other	Interventional	Allocation: N/A|Intervention Model: Single Group Assignment|Masking: None (Open Label)|Primary Purpose: Treatment	LWY21076CBY1	February 24, 2022	June 2023	June 2024	January 25, 2022		November 29, 2022	First Affiliated Hospital Bengbu Medical College, Bengbu, Anhui, China		https://ClinicalTrials.gov/show/NCT05205408
DNA+	11	Recruiting	NCT04526730	Neoadjuvant Immunotherapy With Tavo + Electroporation in Combination With Nivo. in Melanoma Patients	intratumoral tavo-EP plus nivolumab IV infusion. Tavokinogene Telseplasmid plus Electoporation. TAVO is DNA-based interleukin-12 (IL-12), a naturally occurring protein in the body with immune-stimulating functions.	No Results Available	Melanoma	Drug: Tavo|Drug: Nivolumab|Device: OncoSec Medical Electroporation Therapy System	Pathological Complete Response|Objective Response Rate|Relapse Free Survival|Overall Survival|Incidence of Treatment-Emergent Adverse Events [Safety and Tolerability]|Risk of Surgical Delay	H. Lee Moffitt Cancer Center and Research Institute|OncoSec Medical Incorporated	All	18 Years and older В (Adult, Older Adult)	Phase 2	33	Other|Industry	Interventional	Allocation: N/A|Intervention Model: Single Group Assignment|Masking: None (Open Label)|Primary Purpose: Treatment	MCC-20313	December 22, 2020	November 2023	November 2023	August 26, 2020		November 4, 2022	Moffitt Cancer Center, Tampa, Florida, United States		https://ClinicalTrials.gov/show/NCT04526730
	12	Recruiting	NCT05375266	Immune Biomarker Study for Head and Neck Cancer	prognostic value of intratumoral and systemic immune biomarkers	No Results Available	Head and Neck Cancer|Oral Cavity Cancer|Oropharyngeal Cancer|Hypopharyngeal Cancer|Laryngeal Cancer	Other: Sampling	Observation of changes in an established immune matrix (intratumoral and systemic) of responding/non-responding patients at certain points in time in the course of treatment|Longitudinal immunophenotyping of the patients: Detection of about 30 distinct immune cell (sub)types together with their activation markers during study period|Analysis of cytokines in peripheral blood and their change at ce…	University of Erlangen-NГјrnberg Medical School|University Hospital Erlangen|University Hospital Regensburg|University Hospital Augsburg	All	18 Years and older В (Adult, Older Adult)		1100	Other	Observational	Observational Model: Case-Control|Time Perspective: Prospective	12-384-B	May 16, 2022	March 31, 2026	March 31, 2027	May 16, 2022		January 25, 2023	ENT - Head and Neck Surgery Department, Erlangen, Bavaria, Germany|Maxillo-Facial-Surgery Department, Erlangen, Bavaria, Germany|Radiation Oncology Department, Erlangen, Bavaria, Germany		https://ClinicalTrials.gov/show/NCT05375266
Checkpoint	13	Recruiting	NCT03252938	Feasibility and Safety of IMP321 (Eftilagimod Alpha) for Advanced Stage Solid Tumors	whether a direct injection of IMP321 into the tumor tissue will be a useful option to improve anti-tumor immune response by placing the immune-therapeutic agent in direct vicinity of immune infiltrates in the tumor bed. IMP321 (Eftilagimod Alpha; LAG-3Ig Fusion Protein). Efti is a soluble version of the immune checkpoint molecule LAG-3.	No Results Available	Solid Tumors|Peritoneal Carcinomatosis	Drug: IMP321|Drug: Avelumab	Feasibility rate|Incidence and severity of adverse events according to CTC criteria|Response|Progression free survival|Overall survival|Immune response in whole blood and tumor tissue	Institut fГјr Klinische Krebsforschung IKF GmbH at Krankenhaus Nordwest	All	18 Years and older В (Adult, Older Adult)	Phase 1	45	Other	Interventional	Allocation: Non-Randomized|Intervention Model: Single Group Assignment|Masking: None (Open Label)|Primary Purpose: Treatment	INSIGHT	August 15, 2017	June 30, 2024	June 30, 2024	August 17, 2017		November 15, 2022	Krankenhaus Nordwest, Frankfurt, Germany		https://ClinicalTrials.gov/show/NCT03252938
Viral	14	Recruiting	NCT04313868	GEN2 Directed Cancer Immunotherapy Trial	GEN2 is administered in repeating three week cycles. On week one, GEN2 is given via injection directly into the tumor lesions on one day. GEN2 is a Moloney Murine replication incompetent retrovector particle containing the genes encoding for a HSV-TK-m2 and hGM-CSF.	No Results Available	Hepatocellular Carcinoma|Metastatic Cancer	Drug: GEN2 (HSV-Thymidine Kinase-m2 and hGM-CSF Genes)	Maximum Tolerated Dose (MTD)|Dose Limiting Toxicity (DLT)|Recommended Phase 2 Dose (RP2D)|Number of participants with treatment-related adverse events as assessed by CTCAE v4.0|Plasma pharmacokinetics of GEN2|HSV-TK-m2 protein expression from GEN2 via serial [18F]FHBG PET and/or SPECT imaging|Preliminary Evidence of anti-tumor activity of GEN2|Clinical research testing for antibodies to retrovect…	GenVivo, Inc.	All	18 Years and older В (Adult, Older Adult)	Phase 1	122	Industry	Interventional	Allocation: Non-Randomized|Intervention Model: Parallel Assignment|Masking: None (Open Label)|Primary Purpose: Other	EPB-002	June 13, 2014	December 31, 2022	March 31, 2023	March 18, 2020		March 29, 2022	Makati Medical Center, Makati City, Philippines|The Medical City, Pasig City, Philippines|National Kidney and Transplant Institute, Quezon City, Philippines|St. Luke's Medical Center, Quezon City, Philippines		https://ClinicalTrials.gov/show/NCT04313868
Virus-like/Adjuvant	15	Recruiting	NCT04916002	CMP-001 in Combination With IV PD-1-Blocking Antibody in Subjects With Certain Types of Advanced or Metastatic Cancer	intratumoral CMP-001 in combination with an intravenous PD-1-blocking antibody. CMP-001 is a CpG-A oligonucleotide TLR9 agonist in a virus-like particle	No Results Available	Merkel Cell Carcinoma|Cutaneous Squamous Cell Carcinoma|Metastatic Cancer|Triple Negative Breast Cancer|Advanced Cancer	Drug: CMP-001|Drug: cemiplimab-rwlc	Objective response rate (ORR) with CMP-001 in combination with a programmed cell death protein 1 (PD-1)-blocking antibody (cemiplimab-rwlc) in study subjects with metastatic or advanced/unresectable CSCC, MCC, or TNBC|Safety and tolerability of CMP-001 administered by intratumoral (IT) injection in combination with a PD-1-blocking antibody (cemiplimab-rwlc) in the study subjects|Efficacy of CMP-0…	Regeneron Pharmaceuticals	All	18 Years and older В (Adult, Older Adult)	Phase 2	279	Industry	Interventional	Allocation: Non-Randomized|Intervention Model: Parallel Assignment|Masking: None (Open Label)|Primary Purpose: Treatment	CMP-001-009	December 15, 2021	April 6, 2026	April 6, 2026	June 7, 2021		November 29, 2022	University of Alabama, Birmingham, Alabama, United States|City of Hope, Duarte, California, United States|UC San Diego Moores Cancer Center, La Jolla, California, United States|University of California, Los Angeles, California, United States|GenesisCare USA, Jacksonville, Florida, United States|Orlando Health Cancer Institute, Orlando, Florida, United States|Norton Cancer Institute, Louisville, K…		https://ClinicalTrials.gov/show/NCT04916002
	16	Recruiting	NCT03608046	Avelumab Combined With Cetuximab and Irinotecan for Treatment Refractory Metastatic Colorectal Microsatellite Stable Cancer	increase the intratumoral immune infiltrate	No Results Available	Colorectal Neoplasms, Malignant	Drug: Avelumab|Drug: Cetuximab Injection|Drug: Irinotecan	Tumor response rate|Adverse events	Cliniques universitaires Saint-Luc- UniversitГ© Catholique de Louvain	All	18 Years to 100 Years В (Adult, Older Adult)	Phase 2	59	Other	Interventional	Allocation: N/A|Intervention Model: Single Group Assignment|Masking: None (Open Label)|Primary Purpose: Treatment	UCL-mCRC-2018-MS100070-0095	October 3, 2018	December 31, 2023	December 31, 2023	July 31, 2018		October 22, 2020	Cliniques Universitaires Saint-Luc, Brussels, Belgium|Grand HГґpital de Charleroi, Charleroi, Belgium		https://ClinicalTrials.gov/show/NCT03608046
Adjuvant	17	Recruiting	NCT05265650	Study of BO-112 With Radiotherapy and Nivolumab for Metastatic Refractory NSCLC	study of repeated IT administrations of BO-112 in combination with ablative radiotherapy (SABR) and concurrent nivolumab. BO-112 is a dsRNA (poly I:C) formulated with the cationic carrier polyethylenimine, which improves its intracellular delivery. Preclinically it acts by activating TLR3, RIG-1 and MDA-5, leading to an immunogenic cell death and increasing immune-checkpoint inhibition effects.	No Results Available	Non-Small Cell Lung Cancer Metastatic	Drug: BO-112 in combination with ablative radiotherapy (SABR) and nivolumab|Procedure: Tissue Biopsies	Incidence of Adverse events and Serious Adverse Events|Number and Proportion of Subjects with TEAEs Grade в‰Ґ3|Efficacy: Progression-free survival (PFS)|Efficacy: ORR, DCR|Tolerability: study discontinuations	Clinica Universidad de Navarra, Universidad de Navarra|Highlight Therapeutics	All	18 Years and older В (Adult, Older Adult)	Phase 1|Phase 2	30	Other|Industry	Interventional	Allocation: N/A|Intervention Model: Single Group Assignment|Masking: None (Open Label)|Primary Purpose: Treatment	BORT-112	June 13, 2022	March 2024	June 2024	March 3, 2022		July 19, 2022	ClГ­nica Universidad de Navarra, Pamplona, Navarra, Spain		https://ClinicalTrials.gov/show/NCT05265650
	18	Recruiting	NCT03708224	Preoperative Immunotherapy in Patients With Squamous Cell Carcinoma of the Head and Neck	Intratumoral CD3+ T-cells will be identified by immunohistochemistry	No Results Available	Cancer|Carcinoma|Squamous Cell Carcinoma|Head and Neck Cancer	Biological: Atezolizumab|Biological: Tocilizumab|Biological: Tiragolumab	Proportion of subjects with a >= 40% increase in the cluster of differentiation 3 (CD3) counts|R0 resection rate|Changes in immune parameters using mass cytometry (CyTOF), histology and gene expression|Changes in peripheral immune responses using CyTOF|Number of participants with treatment-related adverse events	Alain Algazi|Genentech, Inc.|University of California, San Francisco	All	18 Years and older В (Adult, Older Adult)	Phase 2	55	Other|Industry	Interventional	Allocation: Non-Randomized|Intervention Model: Sequential Assignment|Masking: None (Open Label)|Primary Purpose: Treatment	177018|NCI-2018-01992|ML40180	March 8, 2019	June 30, 2027	June 30, 2027	October 17, 2018		January 17, 2023	University of San Francisco, California, San Francisco, California, United States		https://ClinicalTrials.gov/show/NCT03708224
	19	Recruiting	NCT04646837	Mechanism of Response to IMFINZI Neoadjuvant Therapy in Non-small Cell Lung Cancer Patients Based on Multiple-omics Models	explore the intratumoral immune consequences of PD-1 monoclonal antibody administration	No Results Available	Non-small Cell Lung Cancer	Drug: Durvalumab|Drug: Albumin Paclitaxel|Drug: Carboplatin/Cisplatin	MPR|Progression free survival|Overall survival|Toxicity profile	Peking Union Medical College Hospital|AstraZeneca	All	80 Years to 80 Years В (Older Adult)	Phase 1|Phase 2	20	Other|Industry	Interventional	Allocation: N/A|Intervention Model: Single Group Assignment|Masking: None (Open Label)|Primary Purpose: Treatment	2020-IMFINZI-001	May 1, 2021	May 2022	March 2025	November 30, 2020		April 22, 2022	Peking Union Medical College Hospital, Beijing, Beijing, China		https://ClinicalTrials.gov/show/NCT04646837
Viral	20	Recruiting	NCT03954067	A Study of an Intratumoral Oncolytic Virus in Patients With Advanced Metastatic Solid Tumors	ASP9801 - An engineered oncolytic virus with potential antineoplastic and immunomodulating activities. Administered by intratumoral injection.	No Results Available	Metastatic Cancer|Solid Tumors|Advanced Cancer	Biological: ASP9801|Combination Product: Pembrolizumab	Dose Limiting Toxicities (DLT) - dose escalation part|Safety and tolerability assessed by Adverse Events (AEs)|Number of participants with laboratory value abnormalities and/or adverse events|Number of participants with vital sign abnormalities and /or adverse events|Safety assessed by 12- lead electrocardiograms (ECGs) adverse events|Percent change from baseline in antitumor activity of ASP9801|…	Astellas Pharma Global Development, Inc.|Merck Sharp & Dohme LLC|Astellas Pharma Inc	All	18 Years and older В (Adult, Older Adult)	Phase 1	260	Industry	Interventional	Allocation: Non-Randomized|Intervention Model: Sequential Assignment|Masking: None (Open Label)|Primary Purpose: Treatment	9801-CL-0101|KEYNOTE-B26	August 8, 2019	October 31, 2024	October 31, 2024	May 17, 2019		January 9, 2023	University of Alabama at Birmingham, Birmingham, Alabama, United States|University of Arizona - Arizona Cancer Center, Tucson, Arizona, United States|California Cancer Associates for Research & Excellence, Encinitas, California, United States|The Angeles Clinic and Research Institute, Los Angeles, California, United States|Hartford Healthcare, Hartford, Connecticut, United States|The University o…		https://ClinicalTrials.gov/show/NCT03954067
MNP	21	Recruiting	NCT03589339	NBTXR3 Activated by Radiotherapy for Patients With Advanced Cancers Treated With An Anti-PD-1 Therapy	intratumoral injection of NBTXR3 activated by radiotherapy in combination with anti-PD-1 therapy. NBTXR3, a novel radioenhancer composed of functionalized hafnium oxide crystalline nanoparticles	No Results Available	Radiotherapy|Immunotherapy|Microsatellite Instability-High Solid Malignant Tumour|Metastasis From Malignant Tumor of Liver|Squamous Cell Carcinoma of Head and Neck|Metastasis From Malignant Tumor of Cervix|Metastatic Renal Cell Carcinoma|Metastasis From Malignant Melanoma of Skin (Disorder)|Metastatic Triple-Negative Breast Carcinoma|Metastatic NSCLC|Metastasis From Malignant Tumor of Bladder (Di…	Drug: NBTXR3|Radiation: SABR|Drug: Nivolumab|Drug: Pembrolizumab	Determination of the Recommended Dose|Evaluation of the anti-tumor response of R3/RT/PD-1|Assessment of the safety and feasibility of R3/RT/PD-1|Evaluation of the body kinetic profile of intratumorally injected NBTXR3	Nanobiotix	All	18 Years and older В (Adult, Older Adult)	Phase 1	145	Industry	Interventional	Allocation: N/A|Intervention Model: Sequential Assignment|Masking: None (Open Label)|Primary Purpose: Treatment	1100	January 16, 2019	March 30, 2023	May 30, 2028	July 17, 2018		January 27, 2023	Christiana Care Health Services, Newark, Delaware, United States|Moffitt Cancer Center, Tampa, Florida, United States|University of Chicago Medical Center, Chicago, Illinois, United States|Johns Hopkins University, Sidney Kimmel Comprehensive Cancer Center, Baltimore, Maryland, United States|Henry Ford Cancer Institute, Detroit, Michigan, United States|Quantum Santa Fe, Santa Fe, New Mexico, Unit…		https://ClinicalTrials.gov/show/NCT03589339
mAb	22	Recruiting	NCT04059588	A Study Investigating the Safety and Tolerability of an Immune Treatment in Cancer Patients With Lesions to the Skin	Intratumoral Injection of an Fc-engineered Anti-CD40 Monoclonal Antibody (2141-V11)	No Results Available	Cancer|Solid Tumor|Cancer of Skin	Drug: 2141 V-11	Number of patients with treatment-emergent adverse events assessed by NCI CTCAE v4.03|Incidence and severity of DLTs reported and their relationship to 2141-V11 administration assessed by NCI CTCAE v4.03|Change from baseline laboratory assessments and toxicities over time in abnormal Complete Blood Count labs and Complete Metabolic Panel labs assessed by SI laboratory reference ranges|Changes fro…	Rockefeller University	All	18 Years and older В (Adult, Older Adult)	Phase 1	28	Other	Interventional	Allocation: N/A|Intervention Model: Sequential Assignment|Masking: None (Open Label)|Primary Purpose: Other	DKN-0993	January 16, 2020	July 31, 2025	July 31, 2025	August 16, 2019		March 17, 2022	Rockefeller University, New York, New York, United States		https://ClinicalTrials.gov/show/NCT04059588
Peptide	23	Recruiting	NCT04260529	CyPep-1 Injections in Cancer Inducing Lymphocyte Infiltrate Accumulations	CyPep-1 when administered directly into malignant tumors in monotherapy and in combination with anti-PD-1 antibody pembrolizumab. CyPep-1 is a chemically synthesized peptide with oncolytic properties. It selectively targets cancer cells based on their altered molecular composition, and removes the surrounding cell membrane. This releases tumor neoantigens to the microenvironment and potentially i…	No Results Available	Advanced Solid Tumor Malignancy	Drug: CyPep-1|Drug: Pembrolizumab 25 MG/ML	Type and number of adverse events (AEs)|Dose limiting toxicities (DLTs) and the maximum tolerated dose (MTD) for determination of RP2D of CyPep-1|Objective response rate (ORR) at RP2D in injected lesions	Cytovation AS|Merck Sharp & Dohme LLC	All	18 Years and older В (Adult, Older Adult)	Phase 1|Phase 2	75	Industry	Interventional	Allocation: Non-Randomized|Intervention Model: Parallel Assignment|Masking: None (Open Label)|Primary Purpose: Treatment	CyPep-1|2019-003317-33|KEYNOTE-D02	April 30, 2020	August 2023	December 2023	February 7, 2020		September 1, 2022	Institue Curie, Paris, France|Institute Gustave Roussy, Villejuif, France|NKI/AvL, Amsterdam, Netherlands|LUMC, Leiden, Netherlands|EMC, Rotterdam, Netherlands|UMCU, Utrecht, Netherlands|Vall d'Hebron (VHIO), Barcelona, Spain|START, Madrid, Spain		https://ClinicalTrials.gov/show/NCT04260529
	24	Recruiting	NCT03772561	Phase I Study of AZD5363 + Olaparib + Durvalumab in Patients With Advanced or Metastatic Solid Tumor Malignancies	To understand the role of tumour microenvironment in regulation of intratumoral immune regulators	No Results Available	Solid Tumor, Adult	Drug: AZD5363+Olaparib+Durvalumab	Objective response rate|Best objective response	National University Hospital, Singapore	All	21 Years to 99 Years В (Adult, Older Adult)	Phase 1	40	Other	Interventional	Allocation: N/A|Intervention Model: Single Group Assignment|Masking: None (Open Label)|Primary Purpose: Treatment	MC01/01/18|2018/00137	December 3, 2018	December 31, 2021	December 31, 2023	December 11, 2018		December 24, 2018	National University Hospital, Singapore, Singapore		https://ClinicalTrials.gov/show/NCT03772561
	25	Recruiting	NCT04443348	Pre-op Pembro + Radiation Therapy in Breast Cancer (P-RAD)	Changes in intratumoral, per-tumoral, and stromal CD4+Foxp3+ T regulatory cell densities	No Results Available	Triple Negative Breast Cancer|Hormone Receptor Positive (HR+), HER2-negative Breast Cancer|Biopsy-proven, Positive Lymph Node(s)	Radiation: Radiation Therapy Boost|Drug: Pembrolizumab|Drug: Paclitaxel|Drug: Carboplatin|Drug: Cyclophosphamide|Drug: Doxorubicin|Drug: Capecitabine	Tumor Infiltrating Lymphocytes (TILs; CD3+/CD8+ T-cell Breast Immunoscore)|Rate of pathologic response in the lymph node|Residual Cancer Burden (RCB) score|Pathologic response rate|Percent change in pre- versus post-treatment intra-tumoral TILs|Percent changes in pre- versus post-treatment peri-tumoral|Percent changes in pre- versus post-treatment stromal CD3+ or CD8+ T cell|Change in TIL counts …	Laura M. Spring, MD|Merck Sharp & Dohme LLC|Breast Cancer Research Foundation|Translational Breast Cancer Research Consortium|Massachusetts General Hospital	All	18 Years and older В (Adult, Older Adult)	Phase 2	120	Other|Industry	Interventional	Allocation: Randomized|Intervention Model: Parallel Assignment|Masking: None (Open Label)|Primary Purpose: Treatment	20-157	December 16, 2020	June 1, 2023	December 1, 2023	June 23, 2020		December 7, 2022	Sibley Memorial Hospital, Washington, District of Columbia, United States|Johns Hopkins, Baltimore, Maryland, United States|Massachusetts General Hospital, Boston, Massachusetts, United States|Dana Farber Cancer Institute, Boston, Massachusetts, United States|Mayo Clinic - Rochester, Rochester, Minnesota, United States|Montefiore Medical Center, Bronx, New York, United States|Memorial Sloan Kette…		https://ClinicalTrials.gov/show/NCT04443348
	26	Recruiting	NCT05049148	Platelets Activation in Brain Neoplasms	intratumoral presence of platelets and the evolution of patients with central nervous system tumors	No Results Available	Glioma|Blood Platelets|Inflammation|Brain Neoplasms	Other: Platelet count in excised tumors	Platelet detection in excised brain/medurally tumors	Fondation Ophtalmologique Adolphe de Rothschild	All	18 Years and older В (Adult, Older Adult)	Not Applicable	50	Other	Interventional	Allocation: N/A|Intervention Model: Single Group Assignment|Masking: None (Open Label)|Primary Purpose: Other	PBN_2021_6	October 20, 2022	January 20, 2025	January 20, 2028	September 17, 2021		February 17, 2023	Fondation A De Rothschild, Paris, France		https://ClinicalTrials.gov/show/NCT05049148
Viral	27	Recruiting	NCT04673942	A First in Human Study of AdAPT-001 in Subjects With Refractory Solid Tumors	AdAPT-001 is an oncolytic virus that is injected directly into the tumor.	No Results Available	Solid Tumor, Adult|Cancer|Neoplasms	Biological: AdAPT-001|Drug: Checkpoint Inhibitor, Immune	Dose Limiting Toxicities (DLT)|Maximum tolerated dose|Safety of a multiple dose regimen of AdAPT-001|Anti-tumor activity of AdAPT-001	EpicentRx, Inc.	All	18 Years and older В (Adult, Older Adult)	Phase 1|Phase 2	79	Industry	Interventional	Allocation: Non-Randomized|Intervention Model: Sequential Assignment|Masking: None (Open Label)|Primary Purpose: Treatment	BETA-PRIME	March 29, 2021	March 1, 2023	March 1, 2024	December 17, 2020		January 23, 2023	City of Hope, Duarte, California, United States|California Cancer Associates for Research and Excellence, cCARE, San Marcos, California, United States|Providence Saint John's Health Center, Santa Monica, California, United States|Cleveland Clinic, Cleveland, Ohio, United States|Mary Crowley Cancer Research, Dallas, Texas, United States|MD Anderson Cancer Center, Houston, Texas, United States		https://ClinicalTrials.gov/show/NCT04673942
Viral	28	Recruiting	NCT05076760	Study of MEM-288 Oncolytic Virus in Solid Tumors Including Non-Small Cell Lung Cancer (NSCLC)	Subjects with selected solid tumors including non-small cell lung cancer (NSCLC) who have a tumor lesion which is accessible for injection will undergo intratumoral injection of MEM-288. MEM-288 is a conditionally replicative oncolytic adenovirus vector encoding transgenes for human interferon beta (IFNβ) and a recombinant chimeric form of CD40-ligand (MEM40).	No Results Available	Solid Tumor|Advanced Cancer|Metastatic Cancer|Non Small Cell Lung Cancer|Cutaneous Squamous Cell Carcinoma|Merkel Cell Carcinoma|Melanoma|Pancreatic Cancer|Triple Negative Breast Cancer|Head and Neck Cancer	Biological: MEM-288 Intratumoral Injection	Maximum Tolerated Dose (MTD)|Safety and Tolerability assessed by Adverse Events (AEs)|Overall Response Rate (ORR)|Disease Control Rate (DCR)|Duration of Response (DoR)|Progression Free Survival (PFS)|Overall Survival (OS)	Memgen, Inc.|Duke Cancer Institute|H. Lee Moffitt Cancer Center and Research Institute	All	18 Years and older В (Adult, Older Adult)	Phase 1	18	Industry|Other	Interventional	Allocation: N/A|Intervention Model: Single Group Assignment|Masking: None (Open Label)|Primary Purpose: Treatment	CCI-2003	February 23, 2022	November 2023	November 2025	October 13, 2021		June 30, 2022	Moffitt Cancer Center, Tampa, Florida, United States|Duke Cancer Institute, Durham, North Carolina, United States		https://ClinicalTrials.gov/show/NCT05076760
	29	Recruiting	NCT04989387	Study of INCA 0186 in Subjects With Advanced Solid Tumors	Intratumoral effect of INCA0186 on CD73 enzymatic activity	No Results Available	Advanced Solid Tumors|Squamous Cell Carcinoma of the Head and Neck (SCCHN)|Gastrointestinal (GI) Malignancies	Drug: INCA00186|Drug: Retifanlimab|Drug: INCB106385	Evaluation of the safety and tolerability of INCA00186 as monotherapy and in combination with retifanlimab and/or INCB106385 as measured by the number of participants with adverse eventsductions and withdrawal of treatment due to AEs|Evaluation of Dose-Limiting Toxicity (DLTs) of INCA00186 as monotherapy and in combination with retifanlimab and/or INCB106385 as measured by safety events during tr…	Incyte Corporation	All	18 Years to 90 Years В (Adult, Older Adult)	Phase 1	210	Industry	Interventional	Allocation: Non-Randomized|Intervention Model: Factorial Assignment|Masking: None (Open Label)|Primary Purpose: Treatment	INCA 0186-101	October 4, 2021	February 11, 2025	February 11, 2025	August 4, 2021		December 5, 2022	The Angeles Clinic and Research Institute, Los Angeles, California, United States|Emory University, Atlanta, Georgia, United States|University of Maryland - Greenebaum Cancer Center, Baltimore, Maryland, United States|Hackensack University Medical Center, Hackensack, New Jersey, United States|Carolina Bio-Oncology Institute, Pllc, Huntersville, North Carolina, United States|Vanderbilt Medical Cen…		https://ClinicalTrials.gov/show/NCT04989387
Radiation	30	Recruiting	NCT05047094	A Safety and Efficacy Study for Combinational Treatment of DaRT and Check Point Inhibitor for Recurrent Unresectable or mHNSCC	An intratumoral insertion of a seed(s), loaded with Radium-224, securely fixed in the seeds.	No Results Available	Head and Neck Squamous Cell Carcinoma|Skin Cancer|Metastatic Head-and-neck Squamous-cell Carcinoma	Device: Diffusing Alpha Radiation Emitters Therapy (DaRT)|Drug: Pembrolizumab	Evaluation of Efficacy of DaRT Treatment in Combination with Pembrolizumab|Adverse Events|Progression Free Survival (PFS)|Overall Survival (OS)|Duration of Response (DOR)	Alpha Tau Medical LTD.	All	18 Years and older В (Adult, Older Adult)	Not Applicable	48	Industry	Interventional	Allocation: N/A|Intervention Model: Single Group Assignment|Masking: None (Open Label)|Primary Purpose: Treatment	CTP-HNCPI-00	November 2, 2021	December 2026	June 2027	September 16, 2021		September 21, 2022	Sharett institute, Hadassah University Hospital - Ein-Kerem, Jerusalem, Israel		https://ClinicalTrials.gov/show/NCT05047094
Viral	31	Recruiting	NCT05228119	A Study of Oncolytic Virus Injection (RT-01) in Combination With PD-1 Inhibitor in Patients With Advanced Solid Tumors	ncolytic Virus Injection(RT-01) RT-01 will be administered either intravenously or with a combination of intravenously and intratumorally	No Results Available	Advanced Solid Tumor	Biological: Oncolytic Virus Injection(RT-01)	Incidence of adverse events|Objective response rate|Disease control rate|The changes from baseline of lymphocyte counts|The concentration of antiviral antibody.|The rate of subjects with viral shedding of RT-01|The Tmax of Viral RNA in blood|The Cmax of Viral RNA in blood	The Affiliated Hospital of Xuzhou Medical University	All	18 Years and older В (Adult, Older Adult)	Phase 1	50	Other	Interventional	Allocation: N/A|Intervention Model: Single Group Assignment|Masking: None (Open Label)|Primary Purpose: Treatment	LWY21076CXY	January 4, 2022	October 1, 2022	October 1, 2023	February 8, 2022		May 9, 2022	The Affiliated Hospital of Xuzhou Medical University, Xuzhou, Jiangsu, China		https://ClinicalTrials.gov/show/NCT05228119
Viral	32	Recruiting	NCT02630368	A Study of Metronomic CP and JX-594 in Patients With Advanced Breast Cancer and Advanced Soft-tissue Sarcoma (METROmaJX)	Combination of avelumab in combination with intratumoral JX-594 injection. JX-594 is an Oncolytic Poxvirus	No Results Available	Solid Tumors|Soft-tissue Sarcoma|Breast Cancer	Drug: Cyclophosphamide and JX-594 dose escalation|Drug: Cyclophosphamide and JX-594|Drug: Cyclophosphamide|Drug: Avelumab and JX-594 and Cyclophosphamide	Phase Ib : Maximum Tolerated Dose evaluated on the first cycle (D1 to D28) of the combination of JX-594 And metronomic cyclophosphamide|Phase II : Advanced soft-tissue sarcoma: Assessment of the antitumor activity of the association of JX-594 and metronomic cyclophosphamide based on 6 month non-progression (CR, PR or SD more than 24 weeks) following RECIST v1.1 criteria|Phase II : Advanced Breast…	Institut BergoniГ©|National Cancer Institute, France|Fondation ARC|Merck Sharp & Dohme LLC|Transgene	All	18 Years and older В (Adult, Older Adult)	Phase 1|Phase 2	197	Other|Industry	Interventional	Allocation: Randomized|Intervention Model: Parallel Assignment|Masking: None (Open Label)|Primary Purpose: Treatment	IB 2014-02|2014-001078-33	September 18, 2015	May 2023	November 2024	December 15, 2015		February 2, 2022	Institut Bergonie, Bordeaux, France		https://ClinicalTrials.gov/show/NCT02630368
	33	Recruiting	NCT05650918	MesoPher/Mitazalimab-combination Therapy in Metastatic Pancreatic Disease (REACtiVe-2 Trial)	Determine the intratumoral treatment effect by measuring T cell influx	No Results Available	Metastatic Pancreatic Cancer	Biological: MesoPher|Biological: Mitazalimab	Incidence of Dose Limiting Toxicities (DLTs) as assessed by CTCAE v5.0|Determine the presence of vaccine-induced dendritic cell mediated immune responses using ELISA and flow cytometry.|Determine the intratumoral treatment effect by measuring T cell influx|Determine vaccine-induced changes in the frequency of immune cell subsets using flow cytometry|Determining predictive gene expression signatur…	Joachim Aerts, MD PhD|Erasmus Medical Center	All	18 Years and older В (Adult, Older Adult)	Phase 1	30	Other	Interventional	Allocation: N/A|Intervention Model: Sequential Assignment|Masking: None (Open Label)|Primary Purpose: Other	NL76592.000.21	August 30, 2021	October 1, 2023	October 1, 2023	December 14, 2022		December 14, 2022	Erasmus MC, Rotterdam, Zuid-Holland, Netherlands		https://ClinicalTrials.gov/show/NCT05650918
	34	Recruiting	NCT03548428	Stereotaxic Body Irradiation of Oligometastase in Sarcoma (Stereosarc)	accumulation of intratumoral T cells in STS with correlation with tumor-specific immune responses.	No Results Available	Sarcoma|Radiosurgery	Drug: Atezolizumab|Radiation: SBRT	efficacy, in term of progression-free survival (PFS) rate at 6 months|PFS by immune response criteria.|ratio PFS after radiotherapy/PFS during the previous line of treatment|Objective response rate.|Rate of progression-free survival (PFS) at 6 months by line of treatment and histology.|Evaluation of the toxicity of the treatment|Overall survival|Evaluation of the quality of life of patient treate…	Centre Antoine Lacassagne|Centre Hospitalier Universitaire de Caen|Roche Pharma AG	All	18 Years and older В (Adult, Older Adult)	Phase 2	103	Other|Industry	Interventional	Allocation: Randomized|Intervention Model: Parallel Assignment|Masking: None (Open Label)|Primary Purpose: Treatment	2017_16	June 4, 2020	July 1, 2025	December 1, 2027	June 7, 2018		July 25, 2022	Centre FranГ§ois BACLESSE, Caen, France|Centre Georges FranГ§ois LECLERC, Dijon, France|Centre Oscar LAMBRET, Lille, France|Centre LГ©on BERARD, Lyon, France|Institut Paoli CALMETTES, Marseille, France|Centre Antoine LACASSAGNE, Nice, France|Centre Eugene MARQUIS, Rennes, France|Centre Henri BECQUEREL, Rouen, France|Institut Claudius REGAUD, Toulouse, France|Institut de CancГ©rologie de Lorraine,…		https://ClinicalTrials.gov/show/NCT03548428
Viral	35	Recruiting	NCT03152318	A Study of the Treatment of Recurrent Malignant Glioma With rQNestin34.5v.2	rQNestin is an oncolytic viral vector. It is administered via intratumoral injection during biopsy surgery.	No Results Available	Malignant Glioma of Brain|Astrocytoma|Malignant Astrocytoma|Oligodendroglioma|Anaplastic Oligodendroglioma of Brain (Diagnosis)|Mixed Oligo-Astrocytoma|Ependymoma|Ganglioglioma|Pylocytic/Pylomyxoid Astrocytoma|Brain Tumor|Glioma|Brain Cancer|Glioblastoma|Glioblastoma Multiforme	Drug: rQNestin|Drug: Cyclophosphamide|Procedure: Stereotactic biopsy	Maximum Tolerated Dose|MRI Changes in Permeability|MRI Changes in Volume|MRI Changes in Flow|Viral Shedding in Saliva|HSV1 Viremia|HSV1 Antibody Response	Dana-Farber Cancer Institute|National Institutes of Health (NIH)|Candel Therapeutics, Inc.	All	18 Years and older В (Adult, Older Adult)	Phase 1	62	Other|NIH|Industry	Interventional	Allocation: Non-Randomized|Intervention Model: Sequential Assignment|Masking: None (Open Label)|Primary Purpose: Treatment	16-557	July 18, 2017	December 2024	December 2025	May 15, 2017		January 11, 2023	Dana Farber Cancer Institute, Boston, Massachusetts, United States|Brigham and Women's Hospital, Boston, Massachusetts, United States		https://ClinicalTrials.gov/show/NCT03152318
Cell	36	Recruiting	NCT03389230	Memory-Enriched T Cells in Treating Patients With Recurrent or Refractory Grade III-IV Glioma	Patients receive autologous HER2(EQ)BBzeta/CD19t+ Tcm cells via intratumoral/intracavitary catheter. HER2(EQ)BBzeta/CD19t+ Tcm - Memory-Enriched T Cells Lentivirally Transduced to Express a HER2-Specific, Hinge-Optimized, 41BB-Costimulatory Chimeric Receptor and a Truncated CD19	No Results Available	Glioblastoma|Malignant Glioma|Recurrent Glioma|Refractory Glioma|WHO Grade III Glioma	Biological: HER2(EQ)BBО¶/CD19t+ T cells|Other: Laboratory Biomarker Analysis|Procedure: Leukapheresis	Incidence of grade 3 adverse events|Dose limiting toxicities (DLT)|Incidence of adverse events|Chimeric antigen receptor (CAR) T cells detected in tumor cyst fluid, peripheral blood, and cerebrospinal fluid (CSF)|Tumor cyst fluid, peripheral blood, and cerebrospinal fluid (CSF) cytokine levels|Progression free survival|Overall Survival (OS)|Disease response|Chimeric antigen receptor (CAR) T cells…	City of Hope Medical Center|National Cancer Institute (NCI)	All	18 Years to 75 Years В (Adult, Older Adult)	Phase 1	42	Other|NIH	Interventional	Allocation: Non-Randomized|Intervention Model: Parallel Assignment|Masking: None (Open Label)|Primary Purpose: Treatment	16064|NCI-2017-01755|P30CA033572	August 14, 2018	December 15, 2023	December 15, 2023	January 3, 2018		August 16, 2022	City of Hope Medical Center, Duarte, California, United States		https://ClinicalTrials.gov/show/NCT03389230
Toxin+	37	Recruiting	NCT04840615	Intratumor Injection of Anti-Mesothelin Immunotoxin LMB-100 With Ipilimumab in Malignant Mesothelioma	LMB-100 administered into lesion on days 1 and 4 during cycle 1. LMB-100 is a man-made protein designed to kill cancer cells. LMB-100 targets a cancer marker called mesothelin. Mesothelin is found on the surface of many different tumors, including pancreatic cancer, but is made by a very small number of normal tissues.	No Results Available	Mesothelioma	Biological: LMB-100|Drug: ipilimumab	recommended phase 2 dose|safety|objective response rate|duration of response|progression free survival|Overall survival	National Cancer Institute (NCI)|National Institutes of Health Clinical Center (CC)	All	18 Years and older В (Adult, Older Adult)	Phase 1	20	NIH	Interventional	Allocation: N/A|Intervention Model: Single Group Assignment|Masking: None (Open Label)|Primary Purpose: Treatment	10000059|000059-C	June 11, 2021	January 31, 2024	November 30, 2025	April 12, 2021		February 15, 2023	National Institutes of Health Clinical Center, Bethesda, Maryland, United States		https://ClinicalTrials.gov/show/NCT04840615
Viral	38	Recruiting	NCT04427306	Neoadjuvant T-VEC in High Risk Early Melanoma	T-Vec will be given prior to surgery	No Results Available	Melanoma	Drug: T-Vec	Pathologic response	University of California, Davis|Amgen	All	18 Years and older В (Adult, Older Adult)	Phase 2	62	Other|Industry	Interventional	Allocation: N/A|Intervention Model: Single Group Assignment|Masking: None (Open Label)|Primary Purpose: Treatment	1529612|UCDCCSO034	May 21, 2020	December 21, 2022	May 21, 2024	June 11, 2020		June 21, 2022	UC Davis Comprehensive Cancer Center, Sacramento, California, United States|Emory University Winship Cancer Institute, Atlanta, Georgia, United States		https://ClinicalTrials.gov/show/NCT04427306
	39	Recruiting	NCT04106362	Radiation Therapy and Cisplatin With or Without Cetuximab in Treating Patients With HPV Positive, KRAS-Variant Stage III-IV Oropharyngeal Squamous Cell Carcinoma	Will assess if nonsynonymous mutational load and intratumoral heterogeneity are predictive markers for clinical outcome	No Results Available	Clinical Stage III HPV-Mediated (p16-Positive) Oropharyngeal Carcinoma AJCC v8|Clinical Stage IV HPV-Mediated (p16-Positive) Oropharyngeal Carcinoma AJCC v8|KRAS Protein Variant|Pathologic Stage III HPV-Mediated (p16-Positive) Oropharyngeal Carcinoma AJCC v8|Pathologic Stage IV HPV-Mediated (p16-Positive) Oropharyngeal Carcinoma AJCC v8	Biological: Cetuximab|Drug: Cisplatin|Other: Quality-of-Life Assessment|Other: Questionnaire Administration|Radiation: Radiation Therapy	Overall survival (OS)|Primary tumor control|Locoregional recurrence rate|Acute toxicity|Late toxicity	Jonsson Comprehensive Cancer Center|Eli Lilly and Company	All	18 Years and older В (Adult, Older Adult)	Phase 2	70	Other|Industry	Interventional	Allocation: Randomized|Intervention Model: Parallel Assignment|Masking: None (Open Label)|Primary Purpose: Treatment	19-000543|NCI-2019-03636	January 14, 2020	July 1, 2023	July 1, 2024	September 27, 2019		October 17, 2022	UCLA / Jonsson Comprehensive Cancer Center, Los Angeles, California, United States		https://ClinicalTrials.gov/show/NCT04106362
Virus-like/Adjuvant	40	Recruiting	NCT03983668	CMP-001 for Relapsed and Refractory Lymphoma	Intratumoral administration of CMP-001 and intravenous administration of pembrolizumab	No Results Available	Lymphoma	Drug: CMP-001|Drug: Pembrolizumab	Dose limiting toxicities using National Cancer Institute Common Terminology Criteria for Adverse Events (CTCAE) v4.0|Objective response rate with statistical analysis based on the EffTox method	Umar Farooq|Checkmate Pharmaceuticals|Merck Sharp & Dohme LLC|University of Iowa	All	18 Years and older В (Adult, Older Adult)	Phase 1|Phase 2	39	Other|Industry	Interventional	Allocation: N/A|Intervention Model: Single Group Assignment|Masking: None (Open Label)|Primary Purpose: Treatment	201902747	January 31, 2020	April 1, 2023	April 1, 2024	June 12, 2019		April 22, 2022	University of Iowa Hospitals and Clinics, Iowa City, Iowa, United States		https://ClinicalTrials.gov/show/NCT03983668
	41	Recruiting	NCT04988945	TACE and SBRT Followed by Double Immunotherapy for Downstaging Hepatocellular Carcinoma	Disappearance of any intra-tumoral arterial enhancement in all target lesions	No Results Available	HCC	Procedure: TACE|Radiation: SBRT|Drug: Durvalumab|Drug: Tremelimumab	Downstaging for hepatectomy|Response rate measured by mRECIST criteria|Time to progression (TTP)|Progression-free survival (PFS)|Overall survival (OS)|Toxicity tolerability measurement in treatment related procedure|Questionnaire based Quality of Life (QoL) assessment|Pathological response	The University of Hong Kong	All	18 Years and older В (Adult, Older Adult)	Phase 2	33	Other	Interventional	Allocation: N/A|Intervention Model: Single Group Assignment|Masking: None (Open Label)|Primary Purpose: Treatment	UW 20-046	December 1, 2020	December 1, 2022	December 1, 2026	August 4, 2021		August 4, 2021	Department of Surgery, The University of Hong Kong, Hong Kong, Hong Kong|The University of Hong Kong, Hong Kong, Hong Kong		https://ClinicalTrials.gov/show/NCT04988945
	42	Recruiting	NCT03925090	Phase II Trial of Neoadjuvant and Adjuvant Anti-PD-1 Antibody Toripalimab Combined With CCRT in NPC Patients	TILs are lymphoid cells (T cells) that infiltrate solid tumors (intra-tumoral TILs) and stroma (stromal TILs), which play important roles in the tumor microenvironment.	No Results Available	Nasopharyngeal Carcinoma	Drug: Cisplatin+Toripalimab|Drug: Cisplatin+placebo	Progress-free survival (PFS)|Overall Survival (OS)|Locoregional Relapse-Free Survival (LRRFS)|Distant Metastasis-Free Survival (DMFS)|Objective Response Rate пј€ORRпј‰|Incidence rate of adverse events (AEs)|Correlation between the plasma EBV DNA level and PFS|Correlation between pre-treatment PD-L1 expression level and PFS|Correlation between the percentage of tumor-infiltrating lymphocytes (TILs…	Sun Yat-sen University	All	18 Years to 65 Years В (Adult, Older Adult)	Phase 2	138	Other	Interventional	Allocation: Randomized|Intervention Model: Parallel Assignment|Masking: Double (Participant, Investigator)|Primary Purpose: Treatment	B2019-014-01	December 8, 2019	October 2021	October 2023	April 23, 2019		April 22, 2020	Sun Yat-sen Universitty Cancer Center, Guangzhou, Guangdong, China		https://ClinicalTrials.gov/show/NCT03925090
